1           The Molecular Basis for Nestmate Recognition in the Eusocial Ant *Camponotus*

2                                                 *floridanus*

3           **Authors:** S.T. Ferguson<sup>1</sup>, K.Y. Park<sup>1†</sup>, A. Ruff<sup>1†</sup>, L.J. Zwiebel<sup>1\*</sup>

4   **Author Affiliations:**

5   <sup>1</sup>Department of Biological Sciences, Vanderbilt University, 465 21<sup>st</sup> Avenue South, Nashville,  
6   TN 37235, USA.

7   \*Correspondence to: [l.zwiebel@vanderbilt.edu](mailto:l.zwiebel@vanderbilt.edu)

8   †These authors contributed equally to this work

9 **Abstract:** In eusocial ants, aggressive behaviors require a sophisticated ability to detect,  
10 discriminate, and display robust responses to pheromonal and other chemical signatures that  
11 distinguish nestmate friends from non-nestmate foes. While the chemosensory requirements of  
12 maintaining a colonial lifestyle are likely to have, at least in part, driven the expansion of odorant  
13 receptor genes across hymenopteran genomes, the contextual nature of these pheromonal signals  
14 as well as the chemosensory receptors that detect them to regulate nestmate recognition and other  
15 behaviors remains largely unknown. To address this, we have developed an aggression-based  
16 bioassay incorporating a suite of highly selective odorant receptor modulators to characterize the  
17 role of olfaction in nestmate recognition in the formicine ant *Camponotus floridanus*. Our studies  
18 provide direct evidence that the recognition of non-nestmates and the subsequent triggering of  
19 aggressive responses towards them is an active process dependent on odorant-receptor based  
20 detection of precise and unambiguous chemical signatures.

21 **Significance Statement:** Despite a longstanding interest in the chemical ecology, evolution, and  
22 molecular neuroethology of nestmate recognition in eusocial ants, the mechanistic basis for this  
23 process and the specific role of chemosensory receptors in mediating these responses remains  
24 largely unknown. To address these questions, we now report studies using an ant nestmate/non-  
25 nestmate recognition bioassay incorporating a highly selective suite of odorant receptor (OR)  
26 modulators. Our data indicates that acute ablation of olfactory appendages along with specific  
27 inhibition or activation of OR signaling significantly decreases aggression between non-nestmate  
28 ants. Our results are consistent with a model of nestmate recognition in which triggering of  
29 aggression towards foes is dependent upon the detection of precise, unambiguous non-nestmate  
30 signatures that specifically requires OR-based signaling.

31 **Main Text:**

32 **Introduction**

33 Aggression comprises a range of biologically salient social interactions with implications  
34 for individual behavior as well as the collective integrity of animal societies. While aggressive  
35 and/or hostile behaviors can be observed throughout the Metazoa (Ayre & Grosberg, 1995;  
36 Blanchard & Blanchard, 1977; Hölldobler & Wilson, 1990; Mitani, Watts, & Amsler, 2010;  
37 Scheel, Godfrey-Smith, & Lawrence, 2016), recently established experimentally tractable  
38 eusocial insect models present an opportunity to investigate the mechanistic basis of aggression  
39 within a social context. In this regard, ants provide a compelling model for the study of  
40 aggression and its triggering mechanisms within a social context. Ant colonial lifestyles and  
41 reproductive hierarchies are maintained by archetypal aggressive social interactions that are  
42 modulated by their ability to detect, discriminate, and respond to a large array of chemical cues  
43 often known as pheromones (Endler et al., 2004; Hölldobler & Wilson, 1990; Moore & Liebig,  
44 2010; Morel, Vandermeer, & Lavine, 1988). Moreover, recent studies (Trible et al., 2017; Yan et  
45 al., 2017) have demonstrated the value of applying novel genetic and molecular techniques that  
46 have restricted availability/utility in the study of humans and other social primates.

47 The formicine ant *Camponotus floridanus* live in colonies that are founded by a single  
48 reproductive queen that produces at least two morphologically distinct sterile worker groups:  
49 smaller minor workers that comprise the majority of ants within a colony and larger major  
50 workers (Gadau, Heinze, Holldobler, & Schmid, 1996; Hölldobler & Wilson, 1990). Workers  
51 nurse the queen's offspring, forage for food, and defend nest and territory from non-nestmates  
52 (nNMs)—tasks that are necessary for colony cohesion and survival (Hölldobler & Wilson,  
53 1990). Although individual workers contribute to broader colony-level phenotypes, the integrity

54 of social behaviors depends on the collective actions of the colony (Gordon, 2015). Among these  
55 social behaviors, nestmate (NM) recognition—which refers to the process whereby colonies  
56 rigorously discriminate between NMs and nNMs, the latter of which are often met with highly  
57 aggressive responses—is especially important for establishing and maintaining discrete societal  
58 boundaries for *C. floridanus* and many other species of ant (Hölldobler & Wilson, 1990).

59 NM recognition is a dynamic behavior that has been postulated to occur when an  
60 individual ant compares chemically encoded “labels” that it encounters with potentially multiple  
61 neural-encoded “templates” that represent its own particular global colony chemosensory  
62 signature (Neupert, Hornung, Grenville Millar, & Kleineidam, 2018; Obin & Vandermeer, 1989;  
63 R. Vander Meer & Morel, 1998). Subtle variations in the profile of cuticular hydrocarbons  
64 (CHCs) distinguish nNMs from NMs (Guerrieri et al., 2009; Morel et al., 1988; Neupert et al.,  
65 2018). Early genetic models provided a framework for understanding the criteria required to  
66 assess colony membership status when comparing the recognition template to a respective label  
67 (Crozier & Dix, 1979). These have been broadly organized into two categories: the gestalt  
68 model, in which label sharing between individuals yields a distinct template based on a blend;  
69 and individualistic models, which include requiring the exact matching of the label to the  
70 template (“genotype matching”), rejection of any labels containing cues not found in the  
71 template (“foreign-label rejection”), and the acceptance of labels that overlap with the template  
72 (“habituated-label acceptance”). Similarly, there have been efforts to elucidate the rules  
73 governing label-template matching within a phenotypic context (Guerrieri et al., 2009; Neupert  
74 et al., 2018; Sherman et al., 1997). These models suggest that ants discriminate between friends  
75 and foes based on the presence and/or absence of NM (“desirable”) cues or nNM (“undesirable”)  
76 cues. While it was initially proposed that ants accept individuals if they possess desirable cues

77 (D-present) or if they lack undesirable cues (U-absent) to the exclusion of all others (Sherman et  
78 al., 1997), more recent evidence suggests that ants actively detect foes but not friends through the  
79 detection of nNM odor cues (simple U-present model) (Guerrieri et al., 2009). Importantly  
80 however, discrimination may also occur when critical components of the CHC profile are  
81 missing (Neupert et al., 2018). These studies suggest that there are multiple templates being used  
82 to assess different labels, and that there is variability in the importance of a given component of  
83 the label, whether in absence or in abundance, when determining nNM or NM status.

84         While the importance of olfactory responses to CHCs in mediating NM recognition  
85 among ants is well established, several alternative hypotheses have been proposed for the  
86 neuronal and molecular mechanisms required for ants to distinguish friends (NMs) from foes  
87 (nNMs) (A. Brandstaetter, Rössler, & Kleineidam, 2011; A. S. Brandstaetter & Kleineidam,  
88 2011; Crozier & Dix, 1979; Guerrieri et al., 2009; Neupert et al., 2018; Ozaki et al., 2005;  
89 Sherman, Reeve, & Pfennig, 1997). In all of these models, CHCs and other semiochemicals are  
90 detected initially by the peripheral olfactory sensory system which, in *C. floridanus* and indeed  
91 other insects, relies on three major classes of peripheral chemosensory receptors—odorant  
92 receptors (ORs), gustatory receptors (GRs) and ionotropic receptors (IRs). In previous studies,  
93 we have revealed a large expansion of the *OR* gene family in ants as well as other eusocial  
94 insects (Zhou et al., 2015; Zhou et al., 2012), leading to the suggestion that this class of  
95 chemoreceptors is largely responsible for the detection of many socially relevant chemical cues,  
96 including CHCs and general odorants (Pask et al., 2017; Slone et al., 2017). Insect ORs are  
97 expressed in olfactory receptor neurons (ORNs) housed within sensilla on the antennae  
98 (reviewed in (Suh, Bohbot, & Zwiebel, 2014)), where they function as heteromeric complexes  
99 consisting of an obligate and conserved OR co-receptor (Orco) and at least one “tuning” OR that

100 determines odorant (ligand) specificity (Benton, Sachse, Michnick, & Vosshall, 2006; P. L.  
101 Jones, Pask, Rinker, & Zwiebel, 2011; Larsson et al., 2004; Pask, Jones, Rutzler, Rinker, &  
102 Zwiebel, 2011; Sato, Pellegrino, Nakagawa, Vosshall, & Touhara, 2008; Wicher et al., 2008;  
103 Zhou et al., 2012).

104         Despite the long-held appreciation for the role of CHCs and other chemical cues in  
105 mediating NM recognition and social behaviors in ants, little is known about the specific  
106 molecular components of olfactory signal transduction that are active in regulating NM  
107 recognition and the triggering of aggression toward nNMs as well as other social behaviors.  
108 Electrophysiological studies of *Camponotus japonicus* first suggested that a dedicated  
109 multiporous NM recognition sensilla exhibited an all-or-none response to nNM CHC blends but,  
110 importantly, did not respond to NM CHC blends—thus leading to a model in which ants are  
111 desensitized and ultimately anosmic to their own odor cues (Ozaki et al., 2005). In contrast,  
112 recent studies using both antennal electrophysiology and antennal lobe calcium imaging in the  
113 related ant species *C. floridanus* demonstrate these ants are capable of detecting both nNM and  
114 NM odors (A. Brandstaetter et al., 2011; A. S. Brandstaetter & Kleineidam, 2011; Sharma et al.,  
115 2015). It has been proposed these seemingly contradictory findings support a model in which  
116 two sensilla subtypes—one broadly tuned to hydrocarbons and the other tuned to specific  
117 hydrocarbons—facilitate coarse habituation to different labels (Bos & d'Ettorre, 2012).

118         The paucity of data in this regard may be attributed, at least in part, to the challenges of  
119 molecular targeting approaches currently available in the study of Hymenopteran insects. The  
120 development of these techniques represents an important step towards understanding the function  
121 and evolution of the molecular mechanisms involved in complex social behaviors such as  
122 NM/nNM recognition with the potential to shed light on longstanding questions within the field

123 of social insect biology. To begin to address this, we recently carried out a series of behavioral,  
124 physiological, and gene knockout studies to characterize the relationship between ant ORs and  
125 CHCs as well as other biologically salient chemical cues. These studies demonstrated that CHCs  
126 and other general odorants were broadly detected across the various OR subclades while  
127 CRISPR-mediated gene knockout of *orco* resulted in alterations in both solitary and social  
128 behaviors as well as profound neuroanatomical disruptions in the antennal lobe (Pask et al.,  
129 2017; Slone et al., 2017; Yan et al., 2017). Taken together, these studies suggest that ORs play a  
130 critical role not only in a diversity of behaviors but also importantly in ant neural development.

131 Here, we report studies that specifically address the mechanistic basis for NM recognition  
132 by utilizing a suite of highly selective Orco agonists and antagonists to acutely and globally  
133 impact OR-based pathways in the context of a novel NM/nNM aggression bioassay. In this  
134 manner, we are able to directly examine NM recognition to test the hypotheses that aggression is  
135 triggered by the active detection and decoding of discrete chemosensory stimuli that are  
136 dependent upon olfaction and more specifically the functionality of the OR-Orco ion channel  
137 complex is necessary for nNM recognition.

## 138 **Results**

### 139 **Nestmate Recognition Requires Antennal-based Signaling**

140 Initially, we took a broad approach to assess the requirement for *C. floridanus* antennae (as  
141 the principal location of olfactory signaling) to modulate NM/nNM aggression in trials  
142 conducted using adult minor worker ants with either unilateral or bilateral antennal ablations. To  
143 this end, we have developed an aggression-based NM recognition bioassay in which two ants—  
144 NMs from the same home colony or nNMs from two different field collected colonies—were  
145 able to interact with one another after an acclimation period (Fig. 1A). In these studies, both



146 control *C. floridanus* workers as well as those having undergone unilateral ablations were able to  
147 routinely discriminate nNMs from NMs and display only nNM aggression. In contrast, ants with  
148 bilateral antennal ablations displayed a significant and indeed near-complete reduction in  
149 aggression against nNMs (Fig. 1B). These data are consistent with the widely reported ability of  
150 *C. floridanus* workers to robustly discriminate between nNMs and NMs and supports the  
151 hypothesis that their chemosensory apparatus is required to recognize and trigger aggression  
152 against nNMs (A. Brandstaetter et al., 2011; Guerrieri et al., 2009; Hölldobler & Wilson, 1990;  
153 Leonhardt, Brandstaetter, & Kleineidam, 2007; Morel et al., 1988; Neupert et al., 2018; Ozaki et  
154 al., 2005; Pask et al., 2017; Slone et al., 2017).

155 To further control for potentially confounding variables—including the outright death or  
156 incapacitation of the ants due to the damage sustained from the ablations—we measured a  
157 number of other behavioral indicators including total distance traveled, percentage of time spent  
158 moving/not moving, and the frequency of rotations using an automated tracking program (see  
159 Materials and Methods). Here, the activity of a single ant was recorded for three minutes  
160 immediately following the 10-minute acclimation period and preceding the ablation aggression  
161 bioassays. These assays revealed no significant difference between the sham control and either of  
162 the ablation treatments (Fig. 1C-E). That treated ants were able to recover from the injury and  
163 retain fundamental aspects of mobility coupled with the observation that unilaterally ablated  
164 workers maintained the ability to discriminate between NMs and nNMs suggests that the  
165 decrease in aggression was likely due to the absence of antennae-mediated signaling as opposed  
166 to confounding variables introduced by the ablation treatment. However, as the removal of the  
167 antennae disrupts a broad range of both mechanoreceptors as well as chemoreceptors (Nakanishi,

168 Nishino, Watanabe, Yokohari, & Nishikawa, 2009), a more targeted approach is required to  
169 assess the specific function of OR-dependent chemoreceptor signaling in this context.

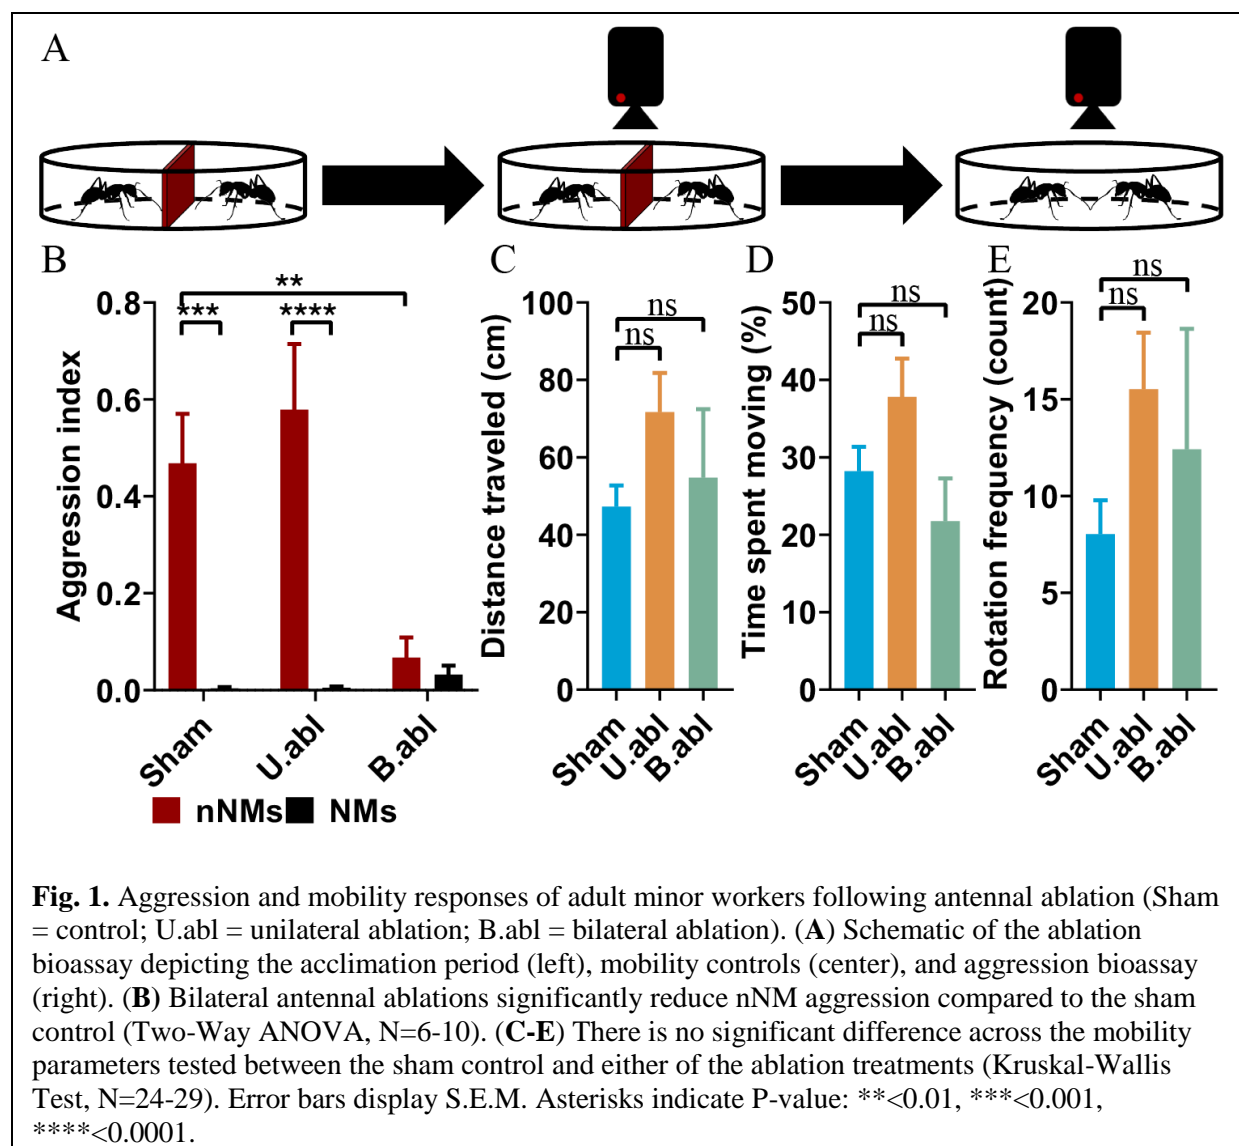

## 170 Nestmate Recognition is an Active, OR-dependent Process

171 In order to further examine this process within the narrow context of assessing the role of  
172 ORs in nNM recognition and aggression, we adapted our bioassay to incorporate the acute  
173 volatile administration of a suite of highly specific Orco allosteric modulators (Fig. 2A). The first  
174 member of this unique class of pharmacological agents (VUAA1) was initially identified through  
175 high-throughput screening for small molecule activators of Orco/OR complexes expressed in

176 HEK293 cells (P. L. Jones et al., 2011; Pask et al., 2011; Rinker et al., 2012). In subsequent  
177 studies that revealed extraordinarily narrow structure-activity relationships, several additional  
178 members of this class of actives were identified and characterized that now comprise several  
179 more potent agonists (including VUAA4 used here), a non-competitive antagonist (VUANT1,  
180 used here) as well as an inactive structural analog (VUAA0, used here) (P. L. Jones et al., 2011;  
181 P. L. Jones et al., 2012; Rinker et al., 2012; Romaine et al., 2014; Taylor et al., 2012).  
182 Subsequent studies, including single-sensillum recordings of female-specific basiconic sensilla in  
183 *C. floridanus*, have demonstrated that the potency of these modulators in both volatile and non-  
184 volatile form is conserved across a wide range of insect orders (Hansen et al., 2014; P. L. Jones  
185 et al., 2012; Sharma et al., 2015; Tsitoura & Iatrou, 2016; Tsitoura, Koussis, & Iatrou, 2015).  
186 Indeed, VUAA-Orco interactions have recently been directly confirmed by cryo-electron  
187 microscopy studies characterizing the structure of an Orco tetramer from the parasitic fig wasp  
188 *Apocrypta bakeri* (Butterwick et al., 2018).

189         The use of these unique and highly specific chemical tools allows us to selectively  
190 pharmacologically target Orco and therefore the functionality of all OR/Orco complexes without  
191 impacting other chemosensory signaling pathways to examine NM recognition with altered OR  
192 signaling in otherwise wild-type adult *C. floridanus* workers. This is an essential aspect of our  
193 approach in light of the broad neuroanatomical alterations that have recently been observed in  
194 the development of the antennal lobes of Orco mutants in two ant species (Trible et al., 2017;  
195 Yan et al., 2017) which are reasonably likely to impact olfactory processing. Indeed, the use of  
196 volatile Orco modulators represent a novel and requisite approach for disrupting OR  
197 functionality in insects such as ants that require alternatives to CRISPR-mediated targeting of  
198 pleiotrophic genes such as *orco* (Trible et al., 2017; Yan et al., 2017). Due to the widespread and

199 obligate colocalization of Orco together with tuning ORs in every insect ORN (W. D. Jones,  
200 Nguyen, Kloss, Lee, & Vosshall, 2005; Larsson et al., 2004; Taylor et al., 2012) exposure to  
201 Orco modulators is expected to have profound and widespread effects. In the case of the VUAA4  
202 Orco agonist, hyper-activation of all Orco/OR complexes is expected to generate an  
203 uninterpretable or “confused” signal while treatment with the VUANT1 antagonist is expected to  
204 silence those complexes and thereby not generate an interpretable signal (Butterwick et al., 2018;  
205 Hansen et al., 2014).

206         Indeed, ants taken from across nine independent colonies exposed to either Orco  
207 modulator displayed a significant reduction, and indeed a near complete elimination, of  
208 aggression towards nNMs (Fig. 2B). Importantly, in addition to the inability to aggressively  
209 respond to nNMs, ants treated with either the Orco agonist or the antagonist displayed no  
210 alteration in their non-aggressive responses to NMs. This lack of misdirected aggression toward  
211 NMs as well as the failure to correctly attack nNMs in ants treated with these highly selective  
212 Orco/OR modulators demonstrates that, in *C. floridanus*, aggression is specifically mediated by  
213 the OR-dependent detection of specific and unambiguous odor cue signatures from nNM foes  
214 rather than the general absence or incorrect processing of familiar signatures of NM friends.  
215 Furthermore, in order to assess whether the VUAA-mediated disruption of OR-signaling reduces  
216 aggression within the narrow social context of NM/nNM recognition or alternatively acts to  
217 broadly inhibit aggressive behaviors, we conducted parallel bioassays that utilized mechanical  
218 rather than chemical stimuli to evoke aggression. Here, using a modified aggression bioassay  
219 based on previous methods described in (Guerrieri & d'Ettorre, 2008) and (Gospocic et al.,  
220 2017), individual ants were challenged with a chemically neutral mechanical stimulus (i.e. a  
221 clean Von Frey filament) and subsequently scored for biting responses as well as wide opening

222 of the mandibles as indicators of aggression. Importantly, inasmuch as there was no significant  
223 difference in aggression among the various treatment groups (Fig. S1) we can conclude that  
224 VUAA-treatments do not generally inhibit aggressive responses in *C. floridanus* but instead  
225 specifically impacts workers' ability to discriminate NMs from nNMs and aggressively respond  
226 to the latter.

227 In order to further control for potentially confounding variables in response to these  
228 volatilization treatments, the activity of a single ant was recorded immediately following a 10-  
229 minute acclimation period. These trials consisted of a continuous 9-minute bioassay separated  
230 into three 3-minute segments: during the first segment, the ants were exposed to a continuous  
231 flow of untreated air ('Acclimation'); for the second segment, the ants were exposed to a  
232 continuous flow of volatilized VUAA0, VUANT1, or VUAA4 or untreated air in the case of the  
233 blank control using the same parameters established for the volatilization aggression bioassay  
234 ('Treatment'); and lastly, during the third segment, the ants were again exposed to a continuous  
235 flow of untreated air ('Recovery'). A Y-junction connected to the compressed air tank alternated  
236 between the empty test tube during the Acclimation and Recovery phases and the treatment or  
237 blank tube during the Treatment phase. An examination of overall mobility parameters revealed  
238 no significant interaction effect when comparing control ants and ants treated with either an Orco  
239 agonist or antagonist before, during, or after exposure to each treatment (Fig. 2C-E).

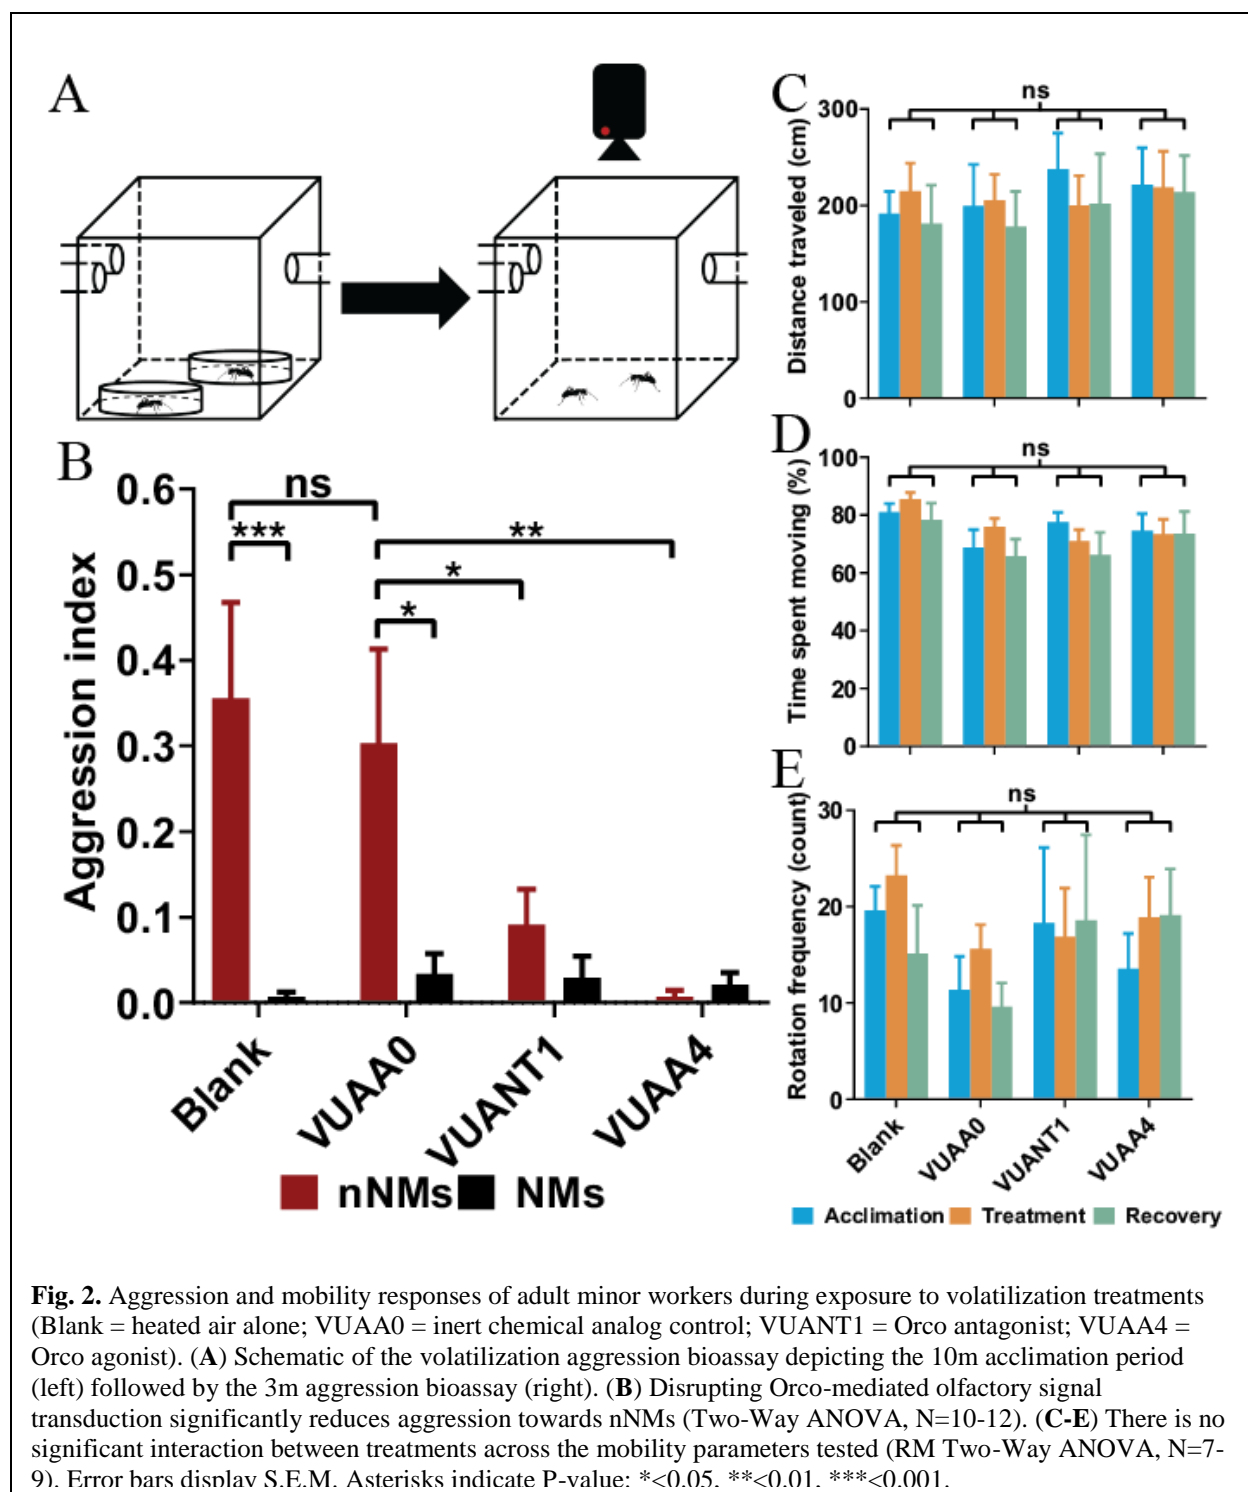

240 **Discussion**

241 In ants and other eusocial insects, NM recognition depends on the ability to discriminate  
 242 between self and non-self where the recognition of non-self—in this instance nNMs—often leads

243 to aggression (reviewed in (Sturgis & Gordon, 2012)). These aggressive responses are mediated  
244 by the detection of subtle differences in the CHC profiles that demarcate individual colonies  
245 (Guerrieri et al., 2009; Leonhardt et al., 2007; Morel et al., 1988; Neupert et al., 2018). Here, we  
246 demonstrate that the lack of any odor signal or the presence of ambiguous odor cues that are  
247 expected after treatment with an Orco antagonist or agonist, respectively, are both equally  
248 insufficient to elicit aggression between nNMs. The observation that an Orco antagonist  
249 decreases aggression between nNMs is broadly consistent with a simple U-present rejection  
250 model and supports the view that ants are not actively recognizing friends (Guerrieri et al., 2009;  
251 van Zweden & d'Ettorre, 2010). However, the curious finding that an Orco agonist would also  
252 decrease aggression between nNMs rather than increase aggression between NMs suggests that  
253 the simple presence of foreign or otherwise  
254 ambiguous cues are also insufficient to elicit  
255 aggression. Rather, these studies support a  
256 model in which an unambiguous triggering  
257 stimulus must be precisely detected in order to  
258 evoke aggression (Fig. 3). As such, we propose  
259 that the recognition mechanism in *C. floridanus*  
260 occurs via a lock-and-key mechanism whereby  
261 the specific parameters of the foreign chemical  
262 label key, defined by the combinatorial presence  
263 and/or absence of salient odor cues, must be  
264 precisely detected by an OR-mediated lock.  
265 Under this assumption, ants may identify nNMs

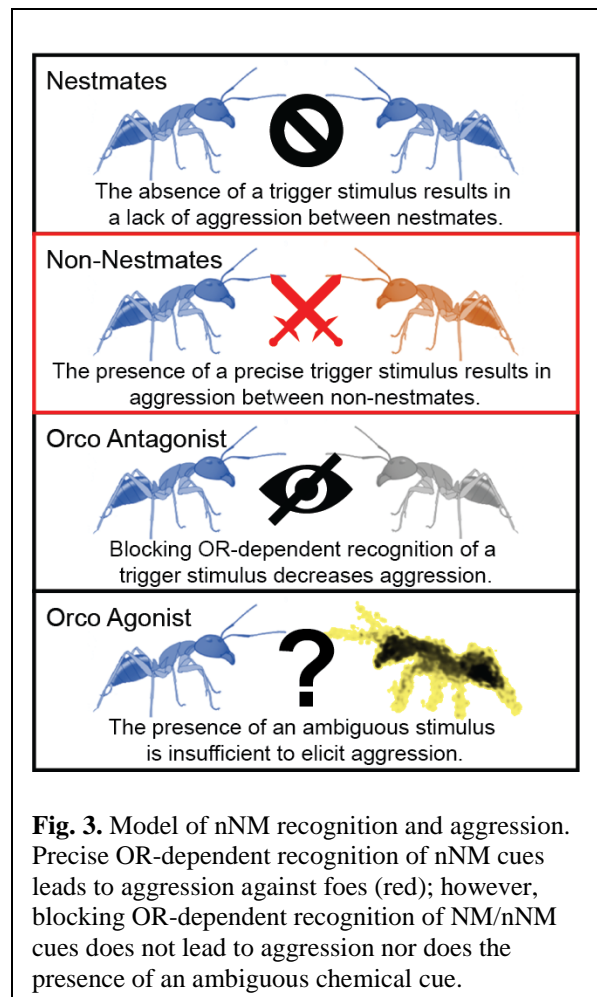

266 in two different ways which are not necessarily mutually exclusive: 1. unfamiliar nNM labels are  
267 compared to a familiar NM template with bounded thresholds wherein the label must be  
268 sufficiently different from the template but not so different as to be ambiguous; or 2. unfamiliar  
269 nNM labels are compared to intruder templates that represent odor profiles which should be  
270 rejected from the colony and a certain level of precision between the label and template is  
271 required to elicit aggression.

272 Furthermore, these data suggest that, when faced with some level of uncertainty, *C.*  
273 *floridanus* workers default towards acceptance rather than rejection. Over and above the benefits  
274 of conserving energy by avoiding potentially unnecessary aggression, for ants that spend the  
275 majority of their life cycles within colonies where they are more likely to encounter NMs than  
276 nNMs, this strategy may also reduce acceptance errors and therefore increase overall colony  
277 fitness (Reeve, 1989). It will be interesting to determine whether similar processes occur across  
278 worker behavioral task groups that may spend more time outside the nest (i.e. scouts and  
279 foragers) or whether different recognition methods have evolved across castes and/or species.

280 Here we show that Orco/OR-mediated signaling is necessary for the active detection and  
281 precise processing of a discrete stimulus that triggers aggression towards nNMs in *C. floridanus*.  
282 These results are consistent with previous literature suggesting that, at least in the context of  
283 aggression-mediated discrimination, NM recognition may be more appropriately described as  
284 nNM recognition (Guerrieri et al., 2009; van Zweden & d'Ettorre, 2010). While the roles of  
285 individual ant ORs or even specific subsets of ORs in aggression-mediated NM/nNM recognition  
286 remain to be elucidated, the combinatorial interactions that are expected even among specialized  
287 ORs (Pask et al., 2017; Slone et al., 2017), the plasticity of the potentially numerous neuronal  
288 templates (Leonhardt et al., 2007; Neupert et al., 2018) and the similarly diverse and plastic



289 labels (Kaib et al., 2000; Nascimento, Tannure-Nascimento, Dantas, Turatti, & Lopes, 2013; R.  
290 K. Vander Meer, Saliwanchik, & Lavine, 1989; Wagner et al., 1998) as well as the observation  
291 that even repeated stimulation with colony odors produced variable response patterns in the  
292 antennal lobe (A. Brandstaetter et al., 2011), are likely to make those studies extremely  
293 challenging.

294         Nevertheless, by excluding other signaling pathways and modalities, and directly  
295 demonstrating that precise and unambiguous OR-based signaling is necessary for ants to  
296 distinguish foe from friend, our findings represent a significant advance to link the longstanding  
297 interest in social insect behavior with more recent studies detailing the evolutionary complexity  
298 of the insect olfactory system (Hölldobler & Wilson, 1990; Zhou et al., 2015; Zhou et al., 2012).  
299 Moreover, in addition to the basic biology we have examined, these studies provide a proof  
300 concept for the use of Orco allosteric modulators to disentangle the role of OR-mediated  
301 olfaction in behavior in otherwise genetically intractable systems. The development of these and  
302 other molecular techniques will provide important tools as we continue to refine our  
303 understanding of the molecular mechanisms governing recognition in eusocial systems. Taken  
304 together, these results highlight the importance of the OR family in mediating the precise  
305 signaling paradigms that drive social behaviors in ant taxa. It is tempting to speculate that similar  
306 processes may mediate aggressive responses in other animal systems.

## 307 **Materials and Methods**

### 308 **Ant Husbandry**

309       Nine distinct laboratory colonies of *Camponotus floridanus* originating from field  
310 collections generously obtained by Dr. J. Liebig (Arizona State University) from the Long Key  
311 (D242) and Sugarloaf Key (D601) and Dr. S. Berger (University of Pennsylvania) from the  
312 Fiesta Key (C6, K17, K19, K28, K31, K34, and K39) in South Florida, USA. All colonies were  
313 independently maintained at 25°C, ambient humidity, with a 12-h light:12-h dark photoperiod.  
314 Each colony was provided with Bhatkar diet, crickets, 10% sucrose solution, and distilled water  
315 three times per week. Adult minor workers were used for all experiments and were sampled from  
316 throughout the colony.

### 317 **Ablation Aggression Bioassay**

318       Tests were conducted during the ZT diel light cycle between ZT2 and ZT12 at ambient  
319 room temperature and humidity and performed using a six-well culture plate with  
320 polytetrafluoroethylene-coated well walls (DuPont®). Individual wells of the six-well culture  
321 plate served as distinct bioassay arenas for behavioral trials (Fig. S2A). In preparation for  
322 experiments, each well (9.6cm<sup>2</sup>) of the six-well culture plate was fitted with a removable plastic  
323 divider that partitioned the well into two halves. The six-well culture plate and dividers were  
324 sterilized using ethanol, air dried, and positioned on top of a light box. Each individual bioassay  
325 well utilized two adult minor ants that were selected from either the same home colony (NMs) or  
326 two distinct colonies (nNMs). All ants were handled wearing gloves and using sterile, soft-tipped  
327 metal forceps and were subsequently discarded after each bioassay to ensure each ant was used  
328 only once.

329 Subject ants were briefly anesthetized with CO<sub>2</sub> before removing their antennal flagella  
330 via an incision across the distal portion of the scape using a clean, unused razor blade. Bilaterally  
331 ablated ants had both flagella removed while unilaterally ablated ants had only a single (right or  
332 left, randomly selected) flagellum removed. Sham treated ants were anesthetized with CO<sub>2</sub>, and  
333 the razor was gently touched to the antennae without damaging any structures. Subsequent to  
334 ablation (or sham) treatment, ants were allowed to recover along with similarly treated NMs for  
335 at least 2 hours prior to testing.

336 Prior to bioassays, two ants (NMs or nNMs) were placed into each well arena, one in  
337 either half, and allowed 10 min to acclimate to handling. To document normal ant behavior  
338 within each well arena, mobility was recorded using a digital high definition camera  
339 (Panasonic® HC-V750) for 3 min (detailed below). The plastic divider within each well arena  
340 was subsequently removed and all ant interactions again recorded for 3 min. The order in which  
341 the treatments were conducted as well as the colony the ants were selected from for any given  
342 trial were randomized using RANDOM.ORG (Randomness and Integrity Services Ltd.).

### 343 **Volatile Orco Modulator Aggression Bioassay**

344 To facilitate the administration of a continuous flow of air containing volatilized VUAA-  
345 class compounds (all custom synthesized as dry solids in-house at Vanderbilt University (P. L.  
346 Jones et al., 2011; P. L. Jones et al., 2012; Romaine et al., 2014; Taylor et al., 2012)) into the  
347 aggression arena, bioassays were conducted in arenas consisting of modified square plastic boxes  
348 with a total area of 85cm<sup>2</sup> (Pioneer Plastics Inc. ®) (Fig. S2A). Conditioned air (78% Nitrogen,  
349 21% Oxygen) was delivered (at a constant 34kpa) from a compressed source (Nashville Gas  
350 LLC) to the test arena through a 12x75mm test tube atop a heat block set at 260°C which  
351 contained 0.025g of the respective treatment compound (VUAA0, VUANT1, or VUAA4) or an

352 empty tube (Blank control) via 18G needles inserted into a rubber septum affixed to the top of  
353 the test tube before exiting through a dedicated exhaust system. Trials were recorded using a  
354 digital high definition camera and scored as described below. Although two plastic tubes were  
355 affixed to the arena during the volatilization aggression bioassays, only a single tube was  
356 actively delivering the test compound or heated air control (Fig. S2B). In each assay, ants were  
357 acclimatized underneath 35mm Petri dish lids (prewashed with ethanol) for 10 minutes after  
358 which the lids were then removed (allowing the ants to interact), the airflow started, and the ants  
359 were then recorded for the 3-minute test period. All treatment compounds were randomized and  
360 coded independently such that the investigator was blinded to the treatment identity.  
361 Furthermore, the sequential order in which the compounds were tested as well as the colony the  
362 ants were selected from for any given trial was randomized using RANDOM.ORG (Randomness  
363 and Integrity Services Ltd.).

### 364 **Aggression Bioassay Scoring**

365 Digital video recordings of all bioassays were viewed post hoc and aggression incidents  
366 manually scored for analyses. Trials in which ants did not interact, were disrupted physically  
367 during removal of the plastic barrier, or were fatally encumbered at trial onset were discarded  
368 from further analyses along with their respective mobility controls in the case of the antennal  
369 ablation bioassays. These interactions were scored by three independent, blinded observers in 10  
370 s intervals using a binary scale such that aggression either did or did not occur (a score of 1 or 0,  
371 respectively; Movies S1-2). Prior to scoring, each observer was trained to recognize “aggression”  
372 as instances in which one or both ants were lunging, biting, or dragging one another. Each 10 s  
373 time interval was scored as either containing an instance of aggression or not to establish the  
374 proportion of time the ants were engaged in aggressive behavior. An aggression index was

375 calculated by dividing the number of observed acts of aggression by the total number of  
376 observed time intervals. The mean aggression index of each video recording across all three  
377 independent scores was used for subsequent statistical analysis.

### 378 **Mobility Control Parameters**

379 Mobility control videos were analyzed using an automated tracking software package  
380 (Ethovision® XT v8.5, Noldus Information Technology) to calculate total distance traveled  
381 (cm), percentage of time spent moving (%), and the frequency of rotations (count). Time spent  
382 moving/not moving was calculated with thresholds of 0.30cm/s (start velocity) and 0.20cm/s  
383 (stop velocity) as determined by the EthoVision® XT software with an averaging interval of 1  
384 sample. To determine the percent of time spent moving, the time spent moving was divided by  
385 the sum of the time spent moving and the time spent not moving to account for instances in  
386 which the subject ant was not detected by the software. A single rotation was defined as a  
387 cumulative turn angle of 90° over a distance of 1.00cm. Turns in the opposite direction of less  
388 than 45° were ignored. The sum of both clockwise and counterclockwise rotations was used to  
389 determine rotational frequency. Trials in which the subject ant was not found for at least 95% of  
390 the recording were discarded, as were videos in which the ants appeared fatally encumbered at  
391 trial onset.

### 392 **Mechanically Evoked Biting and Mandible Opening Response (BMOR) Bioassay**

393 To determine whether disrupting Orco-mediated olfactory signaling disrupts broadly  
394 aggression in a non-social context, individual adult minor workers were briefly anesthetized with  
395 CO<sub>2</sub> before being secured with wax in a modified 200µl pipette tip such that the head and  
396 antennae were accessible. The ants were allowed to acclimate for 10 minutes before being  
397 exposed to a continuous flow of heated air alone or volatilized VU-class compounds as described

398 above in the Volatile Orco Modulator Aggression Bioassays. A clean, ethanol washed 3.61/0.4g  
399 Von Frey hair filament (Baseline® Fold-Up™ Monofilaments Item #12-1741) was then gently  
400 brushed along the anterior portion of the ant's head from the ventral to the dorsal side five times.  
401 Aggression was scored by six independent, blinded observers on a binary scale such that biting  
402 or attempting to bite the filament or wide opening of the mandibles (i.e. the mandibles were  
403 opened beyond parallel) either did (score of 1) or did not (score of 0) occur during the duration  
404 of the trial (Movie S3). An aggression index was calculated by taking the average score across  
405 all observers and used for subsequent statistical analysis. Trials in which the ants had not  
406 recovered from the CO<sub>2</sub> before trial onset were discarded.

#### 407 **Statistical Analysis**

408 Statistical analyses were performed using Graphpad Prism v8.0.0 (GraphPad Software, Inc).  
409 For the aggression bioassays, a two-way ANOVA was first performed followed by Holm-  
410 Sidak's multiple comparisons test to compare NM vs. nNM aggression as well as aggression  
411 across antennal treatments. For the antennal ablation mobility controls as well as the BMOR  
412 bioassays, a Kruskal-Wallis test was performed followed by Dunn's correction for multiple  
413 comparisons. As the volatilization mobility controls had matched samples across different time  
414 points, a repeated measures two-way ANOVA with the Geisser-Greenhouse correction for  
415 violations of sphericity was performed. The number of replicates for each study were as follows:  
416 Ablation Aggression Bioassays: NMs – Sham (9), U.abl (10), B.abl (6); nNMs – Sham (10),  
417 U.abl (9), B.abl (6). Mobility Controls (Ablation): Sham (29), U.abl (29), B.abl (24). Volatile  
418 Orco Modulator Aggression Bioassays: NMs – Blank (10), VUAA0 (10), VUANT1 (12),  
419 VUAA4 (10); nNMs - Blank (12), VUAA0 (11), VUANT1 (10), VUAA4 (12). Volatile Orco  
420 Modulator BMOR Bioassay: Blank (11), VUAA0 (10), VUANT1 (10), VUAA4 (10). Mobility

421 Controls (Volatilization): Blank (8), VUAA0 (8), VUANT1 (7), VUAA4 (9). Information  
422 regarding the statistical test performed and the results from these analyses have been detailed in  
423 Dataset S1.

424 **Data Availability**

425 All data generated or analyzed during this study are included in this published article (and  
426 its supplementary information files) (Datasets S2-6).

427 **Acknowledgments:** We thank the laboratories of our colleagues Dr. J. Liebig (Arizona State  
428 University) and Dr. S. L. Berger (University of Pennsylvania) for ant collections. We also thank Drs.  
429 Berger, R. Bonasio, P. Abbot, A. Carr and HW Honegger for comments on the manuscript. We lastly  
430 thank Drs. HW. Honegger, J. Slone and R. Jason Pitts and Mr. Zi Ye along with other members of the  
431 Zwiebel lab for suggestions throughout the course of this work, Dr. S. Ochieng for ant rearing and  
432 technical help and Dr. AM McAinsh for editorial assistance. This work was supported by a grant from  
433 the National Institutes of Health (NIGMS/RO1GM128336) to LJZ and with endowment funding from  
434 Vanderbilt University.



435 **References**

- 436 Ayre, D. J., & Grosberg, R. K. (1995). Aggression, Habituation, and Clonal Coexistence in the  
437 Sea-Anemone Anthopleura-Elegantissima. *American Naturalist*, 146(3), 427-453.  
438 doi:Doi 10.1086/285808
- 439 Benton, R., Sachse, S., Michnick, S. W., & Vosshall, L. B. (2006). Atypical membrane topology  
440 and heteromeric function of Drosophila odorant receptors in vivo. *PLoS Biol*, 4(2), e20.  
441 doi:10.1371/journal.pbio.0040020
- 442 Blanchard, R. J., & Blanchard, D. C. (1977). Aggressive behavior in the rat. *Behav Biol*, 21(2),  
443 197-224. doi:10.1016/S0091-6773(77)90308-X
- 444 Bos, N., & d'Ettorre, P. (2012). Recognition of social identity in ants. *Frontiers in Psychology*,  
445 3(83). doi:10.3389/fpsyg.2012.00083
- 446 Brandstaetter, A., Rössler, W., & Kleineidam, C. (2011). Friends and Foes from an Ant Brain's  
447 Point of View – Neuronal Correlates of Colony Odors in a Social Insect. *PLoS ONE*,  
448 6(6), e21383-21392. doi:10.1371/journal.pone.0021383
- 449 Brandstaetter, A. S., & Kleineidam, C. J. (2011). Distributed representation of social odors  
450 indicates parallel processing in the antennal lobe of ants. *J. Neurophysiol.*, 106(5), 2437-  
451 2449. doi:10.1152/jn.01106.2010
- 452 Butterwick, J. A., del Marmol, J., Kim, K. H., Kahlson, M. A., Rogow, J. A., Walz, T., & Ruta,  
453 V. (2018). Cryo-EM structure of the insect olfactory receptor Orco. *Nature*, 560(7719),  
454 447-452. doi:10.1038/s41586-018-0420-8
- 455 Crozier, R. H., & Dix, M. W. (1979). Analysis of two genetic models for the innate components  
456 of colony odor in social Hymenoptera. *Behavioural Ecology and Sociobiology*, 4(3), 217-  
457 224. doi:10.1007/BF00297645
- 458 Endler, A., Liebig, J., Schmitt, T., Parker, J. E., Jones, G. R., Schreier, P., & Hölldobler, B.  
459 (2004). Surface hydrocarbons of queen eggs regulate worker reproduction in a social  
460 insect. *Proc Natl Acad Sci USA*, 101(9), 2945-2950. doi:10.1073/pnas.0308447101
- 461 Gadau, J., Heinze, J., Hölldobler, B., & Schmid, M. (1996). Population and colony structure of  
462 the carpenter ant *Camponotus floridanus*. *Molecular Ecology*, 5(6), 785-792.  
463 doi:10.1111/j.1365-294X.1996.tb00374.x
- 464 Gordon, D. M. (2015). From division of labor to the collective behavior of social insects.  
465 *Behavioral Ecology and Sociobiology*, 70(7), 1101-1108. doi:10.1007/s00265-015-2045-  
466 3
- 467 Gospocic, J., Shields, E. J., Glastad, K. M., Lin, Y. P., Penick, C. A., Yan, H., . . . Bonasio, R.  
468 (2017). The Neuropeptide Corazonin Controls Social Behavior and Caste Identity in  
469 Ants. *Cell*, 170(4), 748-759. doi:10.1016/j.cell.2017.07.014
- 470 Grosberg, R. K., Hedgecock, D., & Nelson, K. (1988). *Invertebrate Historecognition*. USA:  
471 Springer US.
- 472 Guerrieri, F. J., & d'Ettorre, P. (2008). The mandible opening response: quantifying aggression  
473 elicited by chemical cues in ants. *J Exp Biol*, 211(Pt 7), 1109-1113.  
474 doi:10.1242/jeb.008508
- 475 Guerrieri, F. J., Nehring, V., Jorgensen, C. G., Nielsen, J., Galizia, C. G., & d'Ettorre, P. (2009).  
476 Ants recognize foes and not friends. *Proceedings of the Royal Society B-Biological*  
477 *Sciences*, 276(1666), 2461-2468. doi:10.1098/rspb.2008.1860
- 478 Hansen, I. A., Rodriguez, S. D., Drake, L. L., Price, D. P., Blakely, B. N., Hammond, J. I., . . .  
479 Romero, A. (2014). The Odorant Receptor Co-Receptor from the Bed Bug, *Cimex*  
480 *lectularius* L. *PLoS ONE*, 9(11), e113692. doi:10.1371/journal.pone.0113692.s007

- 481 Hölldobler, B., & Wilson, E. O. (1990). *The Ants*. Cambridge, MA: Belknap Press of Harvard  
482 Univ Press.
- 483 Jones, P. L., Pask, G. M., Rinker, D. C., & Zwiebel, L. J. (2011). Functional agonism of insect  
484 odorant receptor ion channels. *Proc Natl Acad Sci U S A*, *108*(21), 8821-8825.  
485 doi:10.1073/pnas.1102425108
- 486 Jones, P. L., Pask, G. M., Romaine, I. M., Taylor, R. W., Reid, P. R., Waterson, A. G., . . .  
487 Zwiebel, L. J. (2012). Allosteric antagonism of insect odorant receptor ion channels.  
488 *PLoS ONE*, *7*(1), e30304. doi:10.1371/journal.pone.0030304
- 489 Jones, W. D., Nguyen, T. A., Kloss, B., Lee, K. J., & Vosshall, L. B. (2005). Functional  
490 conservation of an insect odorant receptor gene across 250 million years of evolution.  
491 *Curr Biol*, *15*(4), R119-121. doi:10.1016/j.cub.2005.02.007
- 492 Kaib, M., Eisermann, B., Schoeters, E., Billen, J., Franke, S., & Francke, W. (2000). Task-  
493 related variation of postpharyngeal and cuticular hydrocarbon compositions in the ant  
494 *Myrmecaria eumenoides*. *J Comp Physiol A*, *186*(10), 939-948.  
495 doi:10.1007/s003590000146
- 496 Larsson, M. C., Domingos, A. I., Jones, W. D., Chiappe, M. E., Amrein, H., & Vosshall, L. B.  
497 (2004). Or83b encodes a broadly expressed odorant receptor essential for *Drosophila*  
498 olfaction. *Neuron*, *43*(5), 703-714. doi:10.1016/j.neuron.2004.08.019
- 499 Leonhardt, S. D., Brandstaetter, A. S., & Kleineidam, C. J. (2007). Reformation process of the  
500 neuronal template for nestmate-recognition cues in the carpenter ant *Camponotus*  
501 *floridanus*. *J Comp Physiol A Neuroethol Sens Neural Behav Physiol*, *193*(9), 993-1000.  
502 doi:10.1007/s00359-007-0252-8
- 503 Mitani, J. C., Watts, D. P., & Amstler, S. J. (2010). Lethal intergroup aggression leads to  
504 territorial expansion in wild chimpanzees. *Current Biology*, *20*(12), R507-R508.  
505 doi:10.1016/j.cub.2010.04.021
- 506 Moore, D., & Liebig, J. (2010). Mechanisms of social regulation change across colony  
507 development in an ant. *BMC Evol Biol*, *10*, 328. doi:10.1186/1471-2148-10-328
- 508 Morel, L., Vandermeer, R. K., & Lavine, B. K. (1988). Ontogeny of Nestmate Recognition Cues  
509 in the Red Carpenter Ant (*Camponotus-Floridanus*) - Behavioral and Chemical Evidence  
510 for the Role of Age and Social Experience. *Behavioral Ecology and Sociobiology*, *22*(3),  
511 175-183. doi:Doi 10.1007/Bf00300567
- 512 Nakanishi, A., Nishino, H., Watanabe, H., Yokohari, F., & Nishikawa, M. (2009). Sex-specific  
513 antennal sensory system in the ant *Camponotus japonicus*: structure and distribution of  
514 sensilla on the flagellum. *Cell Tissue Res*, *338*(1), 79-97. doi:10.1007/s00441-009-0863-1
- 515 Nascimento, F. S., Tannure-Nascimento, I. C., Dantas, J. O., Turatti, I. C., & Lopes, N. P.  
516 (2013). Task-Related Variation of Cuticular Hydrocarbon Profiles Affect Nestmate  
517 Recognition in the Giant ant *Dinoponera quadriceps*. *Journal of Insect Behavior*, *26*(2),  
518 212-222. doi:10.1007/s10905-012-9353-5
- 519 Neupert, S., Hornung, M., Grenville Millar, J., & Kleineidam, C. J. (2018). Learning Distinct  
520 Chemical Labels of Nestmates in Ants. *Front Behav Neurosci*, *12*, 191.  
521 doi:10.3389/fnbeh.2018.00191
- 522 Obin, M. S., & Vandermeer, R. K. (1989). Mechanism of Template-Label Matching in Fire Ant,  
523 *Solenopsis-Invicta Buren*, Nestmate Recognition. *Animal Behaviour*, *38*, 430-435.  
524 doi:Doi 10.1016/S0003-3472(89)80036-3

- 525 Ozaki, M., Wada-Katsumata, A., Fujikawa, K., Iwasaki, M., Yokohari, F., Satoji, Y., . . .  
526 Yamaoka, R. (2005). Ant nestmate and nonnestmate discrimination by a chemosensory  
527 sensillum. *Science*, *309*, 311–314. doi:10.1126/science.1105244
- 528 Pask, G. M., Jones, P. L., Rutzler, M., Rinker, D. C., & Zwiebel, L. J. (2011). Heteromeric  
529 Anopheline odorant receptors exhibit distinct channel properties. *PLoS ONE*, *6*(12),  
530 e28774. doi:10.1371/journal.pone.0028774
- 531 Pask, G. M., Slone, J. D., Millar, J. G., Das, P., Moreira, J. A., Zhou, X., . . . Ray, A. (2017).  
532 Specialized odorant receptors in social insects that detect cuticular hydrocarbon cues and  
533 candidate pheromones. *Nat Commun*, *8*(1), 297. doi:10.1038/s41467-017-00099-1
- 534 Reeve, H. K. (1989). The Evolution of Conspecific Acceptance Thresholds. *American*  
535 *Naturalist*, *133*(3), 407-435. doi:Doi 10.1086/284926
- 536 Rinker, D. C., Jones, P. L., Pitts, R. J., Rutzler, M., Camp, G., Sun, L. J., . . . Zwiebel, L. J.  
537 (2012). Novel high-throughput screens of *Anopheles gambiae* odorant receptors reveal  
538 candidate behaviour-modifying chemicals for mosquitoes. *Physiological Entomology*,  
539 *37*(1), 33-41. doi:Doi 10.1111/J.1365-3032.2011.00821.X
- 540 Romaine, I. M., Taylor, R. W., Saidu, S. P., Kim, K., Sulikowski, G. A., Zwiebel, L. J., &  
541 Waterson, A. G. (2014). Narrow SAR in odorant sensing Orco receptor agonists. *Bioorg*  
542 *Med Chem Lett*, *24*(12), 2613-2616. doi:10.1016/j.bmcl.2014.04.081
- 543 Sato, K., Pellegrino, M., Nakagawa, T., Vosshall, L. B., & Touhara, K. (2008). Insect olfactory  
544 receptors are heteromeric ligand-gated ion channels. *Nature*, *452*(7190), 1002-1006.  
545 doi:10.1038/nature06850
- 546 Scheel, D., Godfrey-Smith, P., & Lawrence, M. (2016). Signal Use by Octopuses in Agonistic  
547 Interactions. *Current Biology*, *26*(3), 377-382. doi:10.1016/j.cub.2015.12.033
- 548 Sharma, K. R., Enzmann, B. L., Schmidt, Y., Moore, D., Jones, G. R., Parker, J., . . . Ray, A.  
549 (2015). Cuticular Hydrocarbon Pheromones for Social Behavior and Their Coding in the  
550 Ant Antenna. *Cell Reports*, *12*(8), 1261-1271. doi:10.1016/j.celrep.2015.07.031
- 551 Sherman, P. W., Reeve, H. K., & Pfennig, D. W. (1997). Recognition Systems. In J. R. Krebs &  
552 N. B. Davies (Eds.), *Behavioural ecology: an evolutionary approach* (pp. 69–96).  
553 Oxford, UK: Wiley-Blackwell.
- 554 Slone, J. D., Pask, G. M., Ferguson, S. T., Millar, J. G., Berger, S. L., Reinberg, D., . . . Zwiebel,  
555 L. J. (2017). Functional characterization of odorant receptors in the ponerine ant,  
556 *Harpegnathos saltator*. *Proc Natl Acad Sci U S A*, *114*(32), 8586-8591.  
557 doi:10.1073/pnas.1704647114
- 558 Sturgis, S. J., & Gordon, D. M. (2012). Nestmate recognition in ants (Hymenoptera:  
559 Formicidae): a review. *Myrmecological News*, *16*, 101-110.
- 560 Suh, E., Bohbot, J., & Zwiebel, L. J. (2014). Peripheral olfactory signaling in insects. *Curr Opin*  
561 *Insect Sci*, *6*, 86-92. doi:10.1016/j.cois.2014.10.006
- 562 Taylor, R. W., Romaine, I. M., Liu, C., Murthi, P., Jones, P. L., Waterson, A. G., . . . Zwiebel, L.  
563 J. (2012). Structure-activity relationship of a broad-spectrum insect odorant receptor  
564 agonist. *ACS Chem Biol*, *7*(10), 1647-1652. doi:10.1021/cb300331z
- 565 Tribble, W., Olivos-Cisneros, L., McKenzie, S. K., Saragosti, J., Chang, N. C., Matthews, B. J., . .  
566 . Kronauer, D. J. C. (2017). orco Mutagenesis Causes Loss of Antennal Lobe Glomeruli  
567 and Impaired Social Behavior in Ants. *Cell*, *170*(4), 727-735 e710.  
568 doi:10.1016/j.cell.2017.07.001
- 569 Tsitoura, P., & Iatrou, K. (2016). Positive Allosteric Modulation of Insect Olfactory Receptor  
570 Function by ORco Agonists. *Front Cell Neurosci*, *10*, 275. doi:10.3389/fncel.2016.00275

- 571 Tsitoura, P., Koussis, K., & Iatrou, K. (2015). Inhibition of *Anopheles gambiae* odorant receptor  
572 function by mosquito repellents. *J Biol Chem*, *290*(12), 7961-7972.  
573 doi:10.1074/jbc.M114.632299
- 574 van Zweden, J. S., & d'Ettorre, P. (2010). Nestmate recognition in social insects and the role of  
575 hydrocarbons. In G. J. Blonquist & A. G. Bagnères (Eds.), *Insect Hydrocarbons: Biology,*  
576 *Biochemistry, and Chemical Ecology*: Cambridge University Press.
- 577 Vander Meer, R., & Morel, L. (1998). Nestmate recognition in ants. In R. Vander Meer, M. D.  
578 Breed, M. L. Winston, & K. E. Espelie (Eds.), *Pheromone Communication in Social*  
579 *Insects* (pp. 79-103). Boulder, CO: Westview Press.
- 580 Vander Meer, R. K., Saliwanchik, D., & Lavine, B. (1989). Temporal changes in colony  
581 cuticular hydrocarbon patterns of *Solenopsis invicta* : Implications for nestmate  
582 recognition. *J Chem Ecol*, *15*(7), 2115-2125. doi:10.1007/BF01207442
- 583 Wagner, D., Brown, M. J. F., Broun, P., Cuevas, W., Moses, L. E., Chao, D. L., & Gordon, D.  
584 M. (1998). Task-related differences in the cuticular hydrocarbon composition of harvester  
585 ants, *Pogonomyrmex barbatus*. *Journal of Chemical Ecology*, *24*(12), 2021-2037.  
586 doi:10.1023/A:1020781508889
- 587 Wicher, D., Schafer, R., Bauernfeind, R., Stensmyr, M. C., Heller, R., Heinemann, S. H., &  
588 Hansson, B. S. (2008). *Drosophila* odorant receptors are both ligand-gated and cyclic-  
589 nucleotide-activated cation channels. *Nature*, *452*(7190), 1007-1011.  
590 doi:10.1038/nature06861
- 591 Yan, H., Opachaloemphan, C., Mancini, G., Yang, H., Gallitto, M., Mlejnek, J., . . . Desplan, C.  
592 (2017). An Engineered orco Mutation Produces Aberrant Social Behavior and Defective  
593 Neural Development in Ants. *Cell*, *170*(4), 736-747 e739. doi:10.1016/j.cell.2017.06.051
- 594 Zhou, X., Rokas, A., Berger, S. L., Liebig, J., Ray, A., & Zwiebel, L. J. (2015). Chemoreceptor  
595 Evolution in Hymenoptera and Its Implications for the Evolution of Eusociality. *Genome*  
596 *Biology and Evolution*, *7*(8), 2407-2416. doi:10.1093/gbe/evv149
- 597 Zhou, X., Slone, J. D., Rokas, A., Berger, S. L., Liebig, J., Ray, A., . . . Zwiebel, L. J. (2012).  
598 Phylogenetic and transcriptomic analysis of chemosensory receptors in a pair of  
599 divergent ant species reveals sex-specific signatures of odor coding. *PLoS Genet*, *8*(8),  
600 e1002930. doi:10.1371/journal.pgen.1002930
