1 Odor Coding of Nestmate Recognition in the Eusocial Ant *Camponotus floridanus*

2 **Authors:** S.T. Ferguson<sup>1</sup>, K.Y. Park<sup>1†</sup>, A. Ruff<sup>1†</sup>, I. Bakis<sup>1</sup>, L.J. Zwiebel<sup>1\*</sup>

3 **Author Affiliations:**

4 <sup>1</sup>Department of Biological Sciences, Vanderbilt University, 465 21<sup>st</sup> Avenue South, Nashville,  
5 TN 37235, USA.

6 \*Correspondence to: l.zwiebel@vanderbilt.edu

7 †These authors contributed equally to this work

8 **Abstract:**

9 **Background**

10 In eusocial ants, aggressive behaviors require a sophisticated ability to detect and discriminate  
11 between chemical signatures such as cuticular hydrocarbons that distinguish nestmate friends  
12 from non-nestmate foes. It has been suggested that a mismatch between a chemical signature  
13 (label) and the internal, neuronal representation of the colony odor (template) leads to the  
14 recognition of and subsequent aggression between non-nestmates. While several studies have  
15 demonstrated that ant chemosensory systems, most notably olfaction, are largely responsible for  
16 the decoding of these chemical signatures, a definitive demonstration that odorant receptors are  
17 responsible for the detection and processing of the pheromonal signals that regulate nestmate  
18 recognition has thus far been lacking. To address this, we have developed an aggression-based  
19 bioassay incorporating a suite of highly selective odorant receptor modulators to characterize the  
20 role of olfaction in nestmate recognition in the formicine ant *Camponotus floridanus*.

21 **Results**

22 Validation of our aggression-based behavioral assay was carried out by demonstrating an  
23 antennal requirement for nestmate recognition. In order to adapt this bioassay for the volatile  
24 delivery of Orco modulators, electroantennography was used to show that both a volatilized Orco  
25 antagonist (VUANT1) and an Orco agonist (VUAA4) eliminated or otherwise interfered with the  
26 electrophysiological responses to the hydrocarbon decane, respectively. Volatilize administration  
27 of these compounds to adult workers significantly reduced aggression between non-nestmates  
28 without altering aggression levels between nestmates but did not alter aggressive responses  
29 towards a mechanical stimulus.

### 30 **Conclusions**

31 Our studies provide direct evidence that the antennae (as olfactory appendages) and odorant  
32 receptors (at the molecular level) are necessary for mediating aggression towards non-nestmates.  
33 Furthermore, our observations support a hypothesis in which rejection of non-nestmates depends  
34 on the precise detection and decoding of chemical signatures present on non-nestmates as  
35 opposed to the absence of any information or the active acceptance of familiar signatures. In  
36 addition to describing a novel approach to assess olfactory signaling in genetically intractable  
37 insect systems, these studies contribute to a long-standing interest in odor coding and the  
38 molecular neuroethology of nestmate recognition.

39 **Keywords:** nestmate recognition, odorant receptors, orco, aggression, odor coding

### 40 **Main Text:**

#### 41 **Background**

42 Aggression comprises a range of biologically salient social interactions with implications  
43 for individual behavior as well as the collective integrity of animal societies. While hostile  
44 behaviors can be observed throughout the Metazoa (1-5), recently established experimentally

45 tractable eusocial insect models present an opportunity to investigate the mechanistic basis of  
46 aggression within a social context. In this regard, ants provide a compelling model for the study  
47 of aggression and its triggering mechanisms. Ant colonial lifestyles and reproductive hierarchies  
48 are maintained by aggressive social interactions that are modulated by their ability to detect,  
49 discriminate between, and respond to a large array of chemical cues often known as pheromones  
50 (2, 6-8). Moreover, recent studies (9, 10) have demonstrated the value of applying novel genetic  
51 and molecular techniques that have restricted availability/utility in the study of humans and other  
52 social primates.

53         The formicine ant *Camponotus floridanus* live in colonies that are founded by a single  
54 reproductive queen (2, 11). Workers nurse the queen's offspring, forage for food, and defend  
55 nest and territory from non-nestmates (nNMs) (2). Although individual workers contribute to  
56 broader colony-level phenotypes, the integrity of social behaviors depends on the collective  
57 actions of the colony (12). Among these social behaviors, nestmate (NM) recognition is  
58 especially important for establishing and maintaining discrete societal boundaries for *C.*  
59 *floridanus* and many other species of ant (2). NM recognition is a dynamic behavior that has  
60 been postulated to occur when an individual ant compares chemically encoded "labels" that it  
61 encounters with potentially multiple neural-encoded "templates" that represent its own particular  
62 global colony chemosensory signature whereby a mismatch between a foreign label and the  
63 recognition templates leads to aggression between nNMs (13-15). The foreign label is derived, at  
64 least in part, from subtle variations in the profile of cuticular hydrocarbons (CHCs) that  
65 distinguish nNMs from NMs (6, 13, 16).

66         Early genetic models provided a framework for understanding the criteria required to  
67 assess colony membership status when comparing the recognition template to a respective label

68 (17). These have been broadly organized into two categories: the gestalt model, in which label  
69 sharing between individuals yields a distinct template based on a blend; and individualistic  
70 models, which include requiring the exact matching of the label to the template (“genotype  
71 matching”), rejection of any labels containing cues not found in the template (“foreign-label  
72 rejection”), and the acceptance of labels that overlap with the template (“habituated-label  
73 acceptance”). Similarly, there have been efforts to elucidate the rules governing template-label  
74 matching within a phenotypic context (13, 16, 18). These models suggest that ants discriminate  
75 between friends and foes based on the presence and/or absence of NM (“desirable”) cues or  
76 nNM (“undesirable”) cues. While it was initially proposed that ants accept individuals if they  
77 possess desirable cues (D-present) or if they lack undesirable cues (U-absent) to the exclusion of  
78 all others (18), more recent evidence suggests that ants actively detect foes but not friends  
79 through the detection of nNM odor cues (simple U-present model) (16). Importantly however,  
80 discrimination may also occur when critical components of the CHC profile are missing (13).  
81 These studies suggest that there are multiple templates being used to assess different labels, and  
82 that there is variability in the importance of a given component of the label, whether in absence  
83 or in abundance, when determining nNM or NM status.

84         While the importance of CHCs in mediating NM recognition among ants is well  
85 established, several alternative hypotheses have been proposed for the neuronal and molecular  
86 mechanisms required for ants to distinguish friends from foes (13, 16-21). In all of these models,  
87 CHCs and other semiochemicals are initially detected by the peripheral olfactory sensory system  
88 which relies on three major classes of peripheral chemosensory receptors—odorant receptors  
89 (ORs), gustatory receptors, and ionotropic receptors. Insect ORs are expressed in olfactory  
90 receptor neurons (ORNs) housed within sensilla on the antennae (reviewed in (22)), where they

91 function as heteromeric complexes consisting of an obligate and conserved OR co-receptor  
92 (Orco) and at least one “tuning” OR that determines odorant (ligand) specificity (23-29). Several  
93 studies have revealed a large expansion of the *OR* gene family in ants as well as other eusocial  
94 insects (23, 30-37), leading to the demonstration that this expanded chemoreceptor family is  
95 responsible for the detection of socially relevant chemical cues such as CHCs (38, 39).

96         Despite the long-held appreciation for the role of CHCs and other chemical cues in  
97 mediating NM recognition and social behaviors in ants, little is known about the specific  
98 molecular components of olfactory signal transduction that are active in regulating NM  
99 recognition and the triggering of aggression toward nNMs. Electrophysiological studies of  
100 *Camponotus japonicus* first suggested that a dedicated multiporous NM recognition sensilla  
101 exhibited an all-or-none response to nNM CHC blends but, importantly, did not respond to NM  
102 CHC blends—thus leading to a model in which ants are desensitized and ultimately anosmic to  
103 their own odor cues (19). In contrast, recent studies using both antennal electrophysiology and  
104 antennal lobe calcium imaging in the related ant species *C. floridanus* demonstrate these ants are  
105 capable of detecting both nNM and NM odors (20, 21, 40). It has been proposed that these  
106 seemingly contradictory findings support a model in which two sensilla subtypes—one broadly  
107 tuned to hydrocarbons and the other tuned to specific hydrocarbons—facilitate habituation to  
108 different labels (41).

109         The paucity of data in this regard may be attributed, at least in part, to the challenges of  
110 targeted molecular approaches currently available in the study of Hymenopteran insects. The  
111 development of these techniques represents an important step towards understanding the function  
112 and evolution of the molecular mechanisms involved in complex social behaviors such as NM  
113 recognition with the potential to shed light on longstanding questions within the field of social

114 insect biology. To begin to address this, a series of behavioral, physiological, and gene knockout  
115 studies were carried out to characterize the relationship between ant ORs and CHCs as well as  
116 other biologically salient chemical cues. These studies demonstrated that CHCs and other  
117 general odorants were broadly detected across the various OR subclades while CRISPR-  
118 mediated gene knockout of *orco* resulted in alterations of both solitary and social behaviors as  
119 well as profound neuroanatomical disruptions in the antennal lobe (9, 10, 38, 39). Taken  
120 together, these studies suggest that ORs play a critical role not only in a diversity of behaviors  
121 but also importantly in ant neural development.

122 Here, we report studies that specifically address the odor coding of NM recognition by  
123 utilizing a novel volatilization paradigm incorporating a set of highly selective Orco agonists and  
124 antagonists to acutely and globally impact OR-based pathways in the context of an aggression  
125 bioassay. In this manner, we are able to directly test the hypotheses that aggression is triggered  
126 by the active detection and decoding of discrete chemosensory stimuli and more specifically that  
127 the functionality of the OR-Orco ion channel complex is necessary for NM recognition.

## 128 **Results**

### 129 **Nestmate Recognition Requires Antennal-based Signaling**

130 We first aimed to develop an olfactory-based NM recognition bioassay in which two ants—  
131 NMs from the same home colony or nNMs from two different colonies—were able to interact  
132 with one another after an acclimation period (Fig. 1A). To this end, we initially took a broad  
133 approach to assess the role of olfactory signaling in modulating NM/nNM aggression in the  
134 context of pairwise trials conducted using adult *C. floridanus* minor worker ants with either  
135 unilateral or bilateral antennal ablations. In these studies, both control *C. floridanus* workers as  
136 well as those having undergone unilateral ablations were able to routinely discriminate nNMs

137 from NMs and display only nNM aggression (Fig. 1B). In contrast, ants with bilateral antennal  
138 ablations displayed a significant and indeed near-complete reduction in aggression against  
139 nNMs. These data are consistent with the widely reported ability of *C. floridanus* workers to  
140 robustly discriminate between nNMs and NMs and supports the hypothesis that their  
141 chemosensory apparatus is required to recognize and trigger aggression against nNMs (2, 6, 13,  
142 16, 19, 20, 38, 39, 42-44).

143 To further control for potentially confounding variables—including the outright death or  
144 incapacitation of the ants due to the damage sustained from the ablations—we measured a  
145 number of other behavioral indicators including total distance traveled, percentage of time spent  
146 moving/not moving, and the frequency of rotations using an automated tracking program (see  
147 Methods). Here, the activity of a single ant was recorded for three minutes immediately  
148 following the 10-minute acclimation period and preceding the ablation aggression bioassays  
149 (Fig. 1A). These assays revealed no significant difference between the sham control and either of  
150 the ablation treatments (Fig. 1C-E). That treated ants were able to recover from the injury and  
151 retain fundamental aspects of mobility coupled with the observation that unilaterally ablated  
152 workers maintained the ability to discriminate between NMs and nNMs suggests that the  
153 decrease in aggression was likely due to the absence of antennae-mediated signaling as opposed  
154 to confounding variables introduced by the ablation treatment. However, as the removal of the  
155 antennae disrupts a broad range of both mechanoreceptors as well as chemoreceptors (45), a  
156 more targeted approach is required to assess the specific function of OR-dependent  
157 chemoreceptor signaling in this context.

158 **Nestmate Recognition is an Active, OR-dependent Process**

159           In order to further examine this process within the narrow context of assessing the role of  
160 ORs in NM recognition and aggression, we adapted our bioassay to incorporate the sustained  
161 volatile administration of a set of highly specific Orco allosteric modulators (Fig. 2A, Additional  
162 File 1). The first member of this unique class of pharmacological agents (known as VUAA-class  
163 actives) was initially identified through high-throughput screening for small molecule activators  
164 of Orco/OR complexes expressed in HEK293 cells (28, 29, 46). In subsequent studies that  
165 revealed extraordinarily narrow structure-activity relationships, several additional VUAA-class  
166 actives were identified and characterized that now comprise several more potent agonists  
167 (including VUAA4 used here), a non-competitive antagonist (VUANT1, used here) as well as an  
168 inactive structural analog (VUAA0, used here) (28, 46-49). Further studies, including single-  
169 sensillum recordings of female-specific basiconic sensilla in *C. floridanus*, have demonstrated  
170 that the potency of these modulators in both volatile and non-volatile form is conserved across a  
171 wide range of insect orders (40, 47, 50-52). Indeed, VUAA-Orco interactions have recently been  
172 directly confirmed by cryo-electron microscopy studies characterizing the structure of an Orco  
173 tetramer from the parasitic fig wasp *Apocrypta bakeri* (53).

174           The use of these unique and highly specific chemical tools allows us to selectively target  
175 Orco and therefore the functionality of all OR/Orco complexes to examine NM recognition with  
176 altered OR signaling in otherwise wild-type adult *C. floridanus* workers. This is an essential  
177 aspect of our approach in light of the broad neuroanatomical alterations that have recently been  
178 observed in the development of the antennal lobes of Orco mutants in two ant species (9, 10)  
179 which are reasonably likely to impact olfactory processing. Indeed, the use of volatile Orco  
180 modulators represent a novel and requisite approach for disrupting OR functionality in insects



181 such as ants that require alternatives to CRISPR-mediated targeting of pleiotropic genes such as  
182 *orco* (9, 10).

183         In order to validate the efficacy of the VUAA-class actives delivered within a constant  
184 background airflow to our aggression bioassay arena, we performed electroantennograms  
185 (EAGs) to assess whole antennal responses to several concentrations of the hydrocarbon decane  
186 (C10) in adult workers exposed to heated air (blank control) or volatilized compound (Fig. 2A).  
187 Here, we observed similar dose-dependent responses in both our blank control and VUAA0 (Fig.  
188 2B-D). Indeed, linear regression analysis revealed that the slope of the blank control and  
189 VUAA0 are significantly different from 0 (i.e. a flat line) (Fig. 2B, Additional File 3). Consistent  
190 with expectations, the slope of VUANT1 is not significantly different than 0 (Fig. 2B and E,  
191 Additional File 3), suggesting that exposure to this compound completely eliminated dose-  
192 dependent detection of decane. While volatile administration of VUAA4 also clearly disrupts  
193 hydrocarbon detection, it results in an intermediate phenotype, displaying a muted and partially  
194 dose-dependent response with seemingly static, yet low, responsiveness at higher concentrations  
195 (Fig. 2B and F). These are likely the result of broad ORN desensitization after prolonged  
196 exposure to this potent Orco agonist. Nevertheless, the slope of VUAA4 is significantly different  
197 from 0 (Fig. 2B, Additional File 3), suggesting that dose-dependent hydrocarbon detection and  
198 ORN firing still occur albeit not in the same manner as the controls. Taken together, these results  
199 suggest that acute volatile administration of VUAA-class actives can indeed be used to disrupt  
200 Orco-mediated olfactory signal transduction in ants.

201         Using this newly established volatilization paradigm, we next sought to determine the  
202 precise role of OR-signaling in mediating aggression towards nNMs. Ants taken from across  
203 nine independent colonies exposed to either Orco modulator displayed a significant reduction,

204 and indeed a near complete elimination, of aggression towards nNMs (Fig. 3A). Importantly, in  
205 addition to the inability to aggressively respond to nNMs, ants treated with either the Orco  
206 agonist or the antagonist displayed no alteration in their non-aggressive responses to NMs. This  
207 lack of misdirected aggression toward NMs as well as the failure to correctly attack nNMs in  
208 ants treated with these highly selective Orco/OR modulators demonstrates that, in *C. floridanus*,  
209 aggression is specifically mediated by the OR-dependent detection of specific and unambiguous  
210 odor cue signatures from nNM foes rather than the general absence or incorrect processing of  
211 familiar signatures of NM friends.

212 Furthermore, in order to assess whether the disruption of OR-signaling reduces  
213 aggression within the narrow social context of NM recognition or alternatively acts to broadly  
214 inhibit aggressive behaviors, we conducted parallel bioassays that utilized mechanical rather than  
215 chemical stimuli to evoke aggression. Here, using a modified aggression bioassay based on  
216 previous methods described in (54) and (55), individual ants were challenged with a chemically  
217 neutral mechanical stimulus (i.e. a clean Von Frey filament) and subsequently scored for biting  
218 responses as well as wide opening of the mandibles as indicators of aggression. Importantly,  
219 inasmuch as there was no significant difference in aggression among the various treatment  
220 groups (Additional File 2), we can conclude that disrupting Orco-mediated olfactory signaling  
221 does not generally inhibit aggressive responses in *C. floridanus* but instead specifically impacts  
222 workers' ability to discriminate NMs from nNMs and aggressively respond to the latter.

223 In order to further control for potentially confounding variables in response to these  
224 volatilization treatments, the activity of a single ant was recorded immediately following a 10-  
225 minute acclimation period. These trials consisted of a continuous 9-minute bioassay separated  
226 into three 3-minute segments. During the first segment, the ants were exposed to a continuous

227 flow of untreated air ('Acclimation'); for the second segment, the ants were exposed to a  
228 continuous flow of volatilized VUAA-class active or untreated air in the case of the blank  
229 control using the same parameters established for the volatilization aggression bioassay  
230 ('Treatment'); and lastly, during the third segment, the ants were again exposed to a continuous  
231 flow of untreated air ('Recovery'). A Y-junction connected to the compressed air tank alternated  
232 between the empty test tube during the Acclimation and Recovery phases and the treatment or  
233 blank tube during the Treatment phase. An examination of overall mobility parameters revealed  
234 no significant interaction effect when comparing control ants and ants treated with either an Orco  
235 agonist or antagonist before, during, or after exposure to each treatment (Fig. 3B-D).

## 236 **Discussion**

237 In ants and other eusocial insects, NM recognition depends on the ability to discriminate  
238 between self and non-self where the recognition of non-self—in this instance nNMs—often leads  
239 to aggression (reviewed in (56)). While it is clear that these aggressive responses are mediated by  
240 the detection of subtle differences in the CHC profiles that demarcate individual colonies (6, 13,  
241 16, 42), the precise coding of that information within the olfactory system has remained  
242 ambiguous and, to some extent, controversial. Initially, we took a conservative approach to  
243 validate both our bioassay along with the expected antennal requirement (43, 44) for NM  
244 recognition (Fig 1). Once established, this experimental paradigm was further adapted to  
245 accommodate the sustained volatile administration of highly specific VUAA-class Orco  
246 modulators to directly test the hypothesis that NM recognition in adult *C. floridanus* workers is  
247 solely dependent upon OR-based olfactory signaling as well as facilitate the characterization of  
248 odor coding in this process. In light of the broad developmental defects that result from the loss  
249 of Orco in other ant systems (9, 10), these pharmacological tools provide a unique opportunity to

250 acutely examine the role of OR-based signaling in an otherwise wild-type adult nervous system.  
251 At the same time, in light of the obligate colocalization of Orco together with tuning ORs in  
252 every insect ORN (24, 48, 57), exposure to Orco modulators is expected to have profound and  
253 widespread effects.

254 As previously observed in other contexts (40), treatment with the VUANT1 antagonist  
255 effectively silences all Orco/OR complexes and prevents the generation of any interpretable  
256 signal (Figure 2). In the case of the VUAA4 Orco agonist, activation of all Orco/OR complexes  
257 leads to broad ORN desensitization resulting in significantly diminished signaling (Figure 2) that  
258 we postulate effectively generates an uninterpretable or “confused” coding signal. In either case,  
259 the lack of any odor signal or the presence of imprecise odor cues that are expected after  
260 treatment with an Orco antagonist or agonist, respectively, are both equally insufficient to elicit  
261 aggression between nNMs (Fig. 3).

262 The observation that an Orco antagonist decreases aggression between nNMs is broadly  
263 consistent with a simple U-present rejection model and supports the view that ants are not  
264 actively recognizing friends (16, 58). However, the curious finding that an Orco agonist, which  
265 would be expected to generate a foreign label different from that of the endogenous template,  
266 would also decrease aggression between nNMs rather than increase aggression between NMs  
267 suggests that the simple presence of foreign or otherwise imprecise cues are also insufficient to  
268 elicit aggression. These studies therefore support a model in which an unambiguous triggering  
269 stimulus must be precisely detected in order to evoke aggression. As such, we propose that the  
270 recognition mechanism in *C. floridanus* occurs via a lock-and-key mechanism whereby the  
271 specific parameters of the foreign chemical label key, defined by the combinatorial presence  
272 and/or absence of salient odor cues, must be precisely decoded by an OR-mediated lock (Fig. 4).

273 Under this assumption, ants may identify nNMs in two different ways which are not necessarily  
274 mutually exclusive: 1. unfamiliar nNM labels are compared to a familiar NM template with  
275 bounded thresholds wherein the label must be sufficiently different from the template but not so  
276 different as to be ambiguous; or 2. unfamiliar nNM labels are compared to intruder templates  
277 that represent odor profiles which should be rejected from the colony and a certain level of  
278 precision between the label and template is required to elicit aggression.

279 Furthermore, these data suggest that, when faced with some level of uncertainty, *C.*  
280 *floridanus* workers default towards acceptance rather than rejection. Over and above the benefits  
281 of conserving energy by avoiding potentially unnecessary aggression, for ants that spend the  
282 majority of their life cycles within colonies where they are more likely to encounter NMs than  
283 nNMs, this strategy may also reduce acceptance errors and therefore increase overall colony  
284 fitness (59). It will be interesting to determine whether similar processes occur across worker  
285 behavioral task groups that may spend more time outside the nest (i.e. scouts and foragers) or  
286 whether different recognition methods have evolved across castes and/or species.

## 287 **Conclusions**

288 At a mechanistic level our data effectively excludes the sufficiency of other signaling  
289 pathways and sensory modalities and demonstrates that Orco/OR-mediated signaling is  
290 necessary for the active detection and precise processing of a discrete stimulus that triggers  
291 aggression towards nNMs in *C. floridanus*. These results are consistent with previous literature  
292 suggesting that aggression-mediated NM recognition may be more appropriately described as  
293 nNM recognition (16, 58). While the roles of individual ant ORs or even specific subsets of ORs  
294 in nNM recognition remain to be elucidated, the combinatorial interactions that are expected  
295 even among specialized ORs (38, 39), the plasticity of the potentially numerous neuronal

296 templates (13, 42) and the similarly diverse and plastic labels (60-63) as well as the observation  
297 that even repeated stimulation with colony odors produced variable response patterns in the  
298 antennal lobe (20) are likely to make those studies extremely challenging. Nevertheless, the  
299 demonstration that precise and unambiguous OR-based coding is necessary for ants to  
300 distinguish foe from friend represents a significant advance to link the longstanding interest in  
301 social insect behavior with more recent studies detailing the evolutionary complexity of the  
302 insect olfactory system (2, 23, 30).

## 303 **Methods**

### 304 **Ant Husbandry**

305 Nine distinct laboratory colonies of *Camponotus floridanus* originating from field  
306 collections generously obtained by Dr. J. Liebig (Arizona State University) from the Long Key  
307 (D242) and Sugarloaf Key (D601) and Dr. S. Berger (University of Pennsylvania) from the  
308 Fiesta Key (C6, K17, K19, K28, K31, K34, and K39) in South Florida, USA. All colonies were  
309 independently maintained at 25°C, ambient humidity, with a 12-h light:12-h dark photoperiod.  
310 Each colony was provided with Bhatkar diet, crickets, 10% sucrose solution, and distilled water  
311 three times per week. Adult minor workers were used for all experiments and were sampled from  
312 throughout the colony.

### 313 **Ablation Aggression Bioassay**

314 Tests were conducted during the ZT diel light cycle between ZT2 and ZT12 at ambient  
315 room temperature and humidity and performed using a six-well culture plate with  
316 polytetrafluoroethylene-coated well walls (DuPont®). Individual wells of the six-well culture  
317 plate served as distinct bioassay arenas for behavioral trials (Additional File 1). In preparation  
318 for experiments, each well (9.6cm<sup>2</sup>) of the six-well culture plate was fitted with a removable

319 plastic divider that partitioned the well into two halves. The six-well culture plate and dividers  
320 were sterilized using ethanol, air dried, and positioned on top of a light box. Each individual  
321 bioassay well utilized two adult minor ants that were selected from either the same home colony  
322 (NMs) or two distinct colonies (nNMs). All ants were handled wearing gloves and using sterile,  
323 soft-tipped metal forceps and were subsequently discarded after each bioassay to ensure each ant  
324 was used only once.

325 Subject ants were briefly anesthetized with CO<sub>2</sub> before removing their antennal flagella  
326 via an incision across the distal portion of the scape using a clean, unused razor blade. Bilaterally  
327 ablated ants had both flagella removed while unilaterally ablated ants had only a single (right or  
328 left, randomly selected) flagellum removed. Sham treated ants were anesthetized with CO<sub>2</sub>, and  
329 the razor was gently touched to the antennae without damaging any structures. Subsequent to  
330 ablation (or sham) treatment, ants were allowed to recover along with similarly treated NMs for  
331 at least 2 hours prior to testing.

332 Prior to bioassays, two ants (NMs or nNMs) were placed into each well arena, one in  
333 either half, and allowed 10 min to acclimate to handling. To document normal ant behavior  
334 within each well arena, mobility was recorded using a digital high definition camera  
335 (Panasonic® HC-V750) for 3 min (detailed below). The plastic divider within each well arena  
336 was subsequently removed and all ant interactions again recorded for 3 min. The order in which  
337 the treatments were conducted as well as the colony the ants were selected from for any given  
338 trial were randomized using RANDOM.ORG (Randomness and Integrity Services Ltd.).

### 339 **Electroantennography**

340 Electroantennograms were performed using an IDAC-232 (Ockenfels Syntech GmbH,  
341 Germany) controller linked to a Windows XP computer running EAG2000 (Ockenfels Syntech

342 GmbH, Germany) software. A set of 12x75mm test tubes placed atop a heat block set at 260°C  
343 containing 0.025g of the respective treatment compound (VUAA0, VUANT1, or VUAA4) or an  
344 empty tube (blank control) were connected to a Syntech CS-05 Stimulus flow Controller  
345 (Ockenfels Syntech GmbH, Germany). Using this setup, both the constant background airflow as  
346 well as the 500-ms pulse of stimulus compound contained volatilized VU-class compounds or  
347 heated air (in the case of the blank control).

348         Subjects ants were placed in a 20µL disposable pipet tip that was modified such that the  
349 tip opening was sufficiently wide to allow the unimpeded exposure of the head and antennae. To  
350 prevent movement of the preparation which might otherwise reduce the signal-to-noise of the  
351 recordings, the head and mandibles of the ant were restricted with wax. Borosilicate glass  
352 capillaries (FIL O.D.:1.0mm, World Precision Instruments, Inc.) were customized for EAGs on a  
353 P-2000 laser micro-pipette puller (Sutter Instruments), backfilled with 10<sup>-1</sup> M KCl and 0.05%  
354 PVP buffer and placed over tungsten electrodes. A 30-gauge needle was used to puncture the  
355 right eye to allow for insertion of the reference electrode. The recording electrode was placed  
356 over the distal tip of the left antenna. Decane (C10) (CAS: 124-18-5, Sigma-Aldrich) was  
357 serially diluted in hexane (0.1 µg/µl, 1 µg/µl, 10 µg/µl, 20 µg/µl, and 200 µg/µl). An odor  
358 cartridge was filled with 10µl of decane solution (or hexane alone as a solvent control) and a  
359 handheld butane torch (BernzOmatic, Worthington Industries) was used to volatilize the  
360 compound by heating the odor cartridge for 1.5 seconds. Serial concentrations were assayed  
361 sequentially starting with the lowest concentration and ending with the highest concentration.  
362 Responses were normalized to the hexane solvent control (set at 0) to account for changes in  
363 sensitivity and/or antennae degradation over time throughout the assay, and these values were  
364 used for subsequent data analysis.



## 365 **Volatile Orco Modulator Aggression Bioassay**

366 To facilitate the administration of a continuous flow of air containing volatilized VUAA-  
367 class compounds (all custom synthesized as dry solids in-house at Vanderbilt University (28, 47-  
368 49)) into the aggression arena, bioassays were conducted in arenas consisting of modified square  
369 plastic boxes with a total area of 85cm<sup>2</sup> (Pioneer Plastics Inc. ®) (Additional File 1). Mirroring  
370 the electroantennography, conditioned air (78% Nitrogen, 21% Oxygen) was delivered (at a  
371 constant 34kpa) from a compressed source (Nashville Gas LLC) to the test arena through a  
372 12x75mm test tube atop a heat block set at 260°C which contained 0.025g of the respective  
373 treatment compound (VUAA0, VUANT1, or VUAA4) or an empty tube (Blank control) via 18G  
374 needles inserted into a rubber septum affixed to the top of the test tube before exiting through a  
375 dedicated exhaust system. Trials were recorded using a digital high definition camera and scored  
376 as described below. Although two plastic tubes were affixed to the arena during the volatilization  
377 aggression bioassays, only a single tube was actively delivering the test compound or heated air  
378 control (Additional File 2). In each assay, ants were acclimatized underneath 35mm Petri dish  
379 lids (prewashed with ethanol) for 10 minutes after which the lids were then removed (allowing  
380 the ants to interact), the airflow started, and the ants were then recorded for the 3-minute test  
381 period. All treatment compounds were randomized and coded independently such that the  
382 investigator was blinded to the treatment identity. Furthermore, the sequential order in which the  
383 compounds were tested as well as the colony the ants were selected from for any given trial was  
384 randomized using RANDOM.ORG (Randomness and Integrity Services Ltd.).

## 385 **Aggression Bioassay Scoring**

386 Digital video recordings of all bioassays were viewed post hoc and aggression incidents  
387 manually scored for analyses. Trials in which ants did not interact, were disrupted physically

388 during removal of the plastic barrier, or were fatally encumbered at trial onset were discarded  
389 from further analyses along with their respective mobility controls in the case of the antennal  
390 ablation bioassays. These interactions were scored by three independent, blinded observers in 10  
391 s intervals using a binary scale such that aggression either did or did not occur (a score of 1 or 0,  
392 respectively; Additional Files 10-11). Prior to scoring, each observer was trained to recognize  
393 “aggression” as instances in which one or both ants were lunging, biting, or dragging one  
394 another. Each 10 s time interval was scored as either containing an instance of aggression or not  
395 to establish the proportion of time the ants were engaged in aggressive behavior. An aggression  
396 index was calculated by dividing the number of observed acts of aggression by the total number  
397 of observed time intervals. The mean aggression index of each video recording across all three  
398 independent scores was used for subsequent statistical analysis.

### 399 **Mobility Control Parameters**

400 Mobility control videos were analyzed using an automated tracking software package  
401 (Ethovision® XT v8.5, Noldus Information Technology) to calculate total distance traveled  
402 (cm), percentage of time spent moving (%), and the frequency of rotations (count). Time spent  
403 moving/not moving was calculated with thresholds of 0.30cm/s (start velocity) and 0.20cm/s  
404 (stop velocity) as determined by the EthoVision® XT software with an averaging interval of 1  
405 sample. To determine the percent of time spent moving, the time spent moving was divided by  
406 the sum of the time spent moving and the time spent not moving to account for instances in  
407 which the subject ant was not detected by the software. A single rotation was defined as a  
408 cumulative turn angle of 90° over a distance of 1.00cm. Turns in the opposite direction of less  
409 than 45° were ignored. The sum of both clockwise and counterclockwise rotations was used to  
410 determine rotational frequency. Trials in which the subject ant was not found for at least 95% of

411 the recording were discarded, as were videos in which the ants appeared fatally encumbered at  
412 trial onset.

### 413 **Mechanically Evoked Biting and Mandible Opening Response (BMOR) Bioassay**

414 To determine whether disrupting Orco-mediated olfactory signaling disrupts broadly  
415 aggression in a non-social context, individual adult minor workers were briefly anesthetized with  
416 CO<sub>2</sub> before being secured with wax in a modified 200 $\mu$ l pipette tip such that the head and  
417 antennae were accessible. The ants were allowed to acclimate for 10 minutes before being  
418 exposed to a continuous flow of heated air alone or volatilized VU-class compounds as described  
419 above in the Volatile Orco Modulator Aggression Bioassays. A clean, ethanol washed 3.61/0.4g  
420 Von Frey hair filament (Baseline® Fold-Up™ Monofilaments Item #12-1741) was then gently  
421 brushed along the anterior portion of the ant's head from the ventral to the dorsal side five times.  
422 Aggression was scored by six independent, blinded observers on a binary scale such that biting  
423 or attempting to bite the filament or wide opening of the mandibles (i.e. the mandibles were  
424 opened beyond parallel) either did (score of 1) or did not (score of 0) occur during the duration  
425 of the trial (Additional File 12). An aggression index was calculated by taking the average score  
426 across all observers and used for subsequent statistical analysis. Trials in which the ants had not  
427 recovered from the CO<sub>2</sub> before trial onset were discarded.

### 428 **Statistical Analysis**

429 Statistical analyses were performed using Graphpad Prism v8.0.0 (GraphPad Software, Inc).  
430 For the aggression bioassays, a two-way ANOVA was first performed followed by Holm-  
431 Sidak's multiple comparisons test to compare NM vs. nNM aggression as well as aggression  
432 across antennal treatments. For the antennal ablation mobility controls as well as the BMOR  
433 bioassays, a Kruskal-Wallis test was performed followed by Dunn's correction for multiple

434 comparisons. As the volatilization mobility controls had matched samples across different time  
435 points, a repeated measures two-way ANOVA with the Geisser-Greenhouse correction for  
436 violations of sphericity was performed. For the electroantennography, linear regression analysis  
437 was used to test whether the best-fit slope differed significantly from 0 (i.e. a straight line with  
438 no dose response). The response of the hexane solvent control (i.e. 0  $\mu\text{g}/\mu\text{l}$  of decane) was  
439 normalized to 0mV, therefore the Y-intercept was constrained to X=0, Y=0. The number of  
440 replicates for each study were as follows: Ablation Aggression Bioassays: NMs – Sham (9),  
441 U.abl (10), B.abl (6); nNMs – Sham (10), U.abl (9), B.abl (6). Mobility Controls (Ablation):  
442 Sham (29), U.abl (29), B.abl (24). Volatile Orco Modulator Aggression Bioassays: NMs – Blank  
443 (10), VUAA0 (10), VUANT1 (12), VUAA4 (10); nNMs - Blank (12), VUAA0 (11), VUANT1  
444 (10), VUAA4 (12). Volatile Orco Modulator BMOR Bioassay: Blank (11), VUAA0 (10),  
445 VUANT1 (10), VUAA4 (10). Mobility Controls (Volatilization): Blank (8), VUAA0 (8),  
446 VUANT1 (7), VUAA4 (9). Electroantennography: Blank (5), VUAA0 (5), VUANT1 (6),  
447 VUAA4 (5). Information regarding the statistical test performed and the results from these  
448 analyses have been detailed in Additional File 3.

449 **List of Abbreviations:** Nestmate (NM), non-nestmate (nNM), cuticular hydrocarbon (CHC),  
450 odorant receptor (OR), odorant receptor co-receptor (Orco), odorant receptor neuron (ORN).

451 **Declarations:**

452 **Availability of data and materials**

453 All data generated or analyzed during this study are included in this published article (and  
454 its supplementary information files) (Additional files 3-9).

455 **Competing interests**

456 The authors declare that they have no competing interests.

457 **Funding**

458 This work was supported by a grant from the National Institutes of Health  
459 (NIGMS/RO1GM128336) to LJZ and with endowment funding from Vanderbilt University.

460 **Authors' contributions**

461 STF contributed to the design and conception of the work and was involved in collecting,  
462 analyzing, and interpreting the data as well as drafting and revising the manuscript. KYP and AR  
463 contributed to the conception and design of the experiments and assisted in data acquisition and  
464 analysis for the electrophysiology and aggression bioassay, respectively. IB assisted in data  
465 acquisition and analysis for the electrophysiology experiments. LJZ contributed to the design and  
466 conception of the work as well as interpreting the data and drafting and revising the manuscript.  
467 All authors read and approved the final manuscript.

468 **Acknowledgments**

469 We thank the laboratories of our colleagues Dr. J. Liebig (Arizona State University) and  
470 Dr. S. L. Berger (University of Pennsylvania) for ant collections. We also thank Drs. Berger, R.  
471 Bonasio, P. Abbot, A. Carr and HW Honegger for comments on the manuscript. We lastly thank  
472 Drs. HW. Honegger, J. Slone and R. Jason Pitts and Mr. Zi Ye along with other members of the  
473 Zwiebel lab for suggestions throughout the course of this work, Dr. S. Ochieng for ant rearing  
474 and technical help and Dr. AM McAinsh for editorial assistance.

475 **References**

- 476 1. Blanchard RJ, Blanchard DC. Aggressive behavior in the rat. *Behav Biol.*  
477 1977;21(2):197-224.
- 478 2. Hölldobler B, Wilson EO. *The Ants*. Cambridge, MA: Belknap Press of Harvard Univ  
479 Press; 1990.
- 480 3. Ayre DJ, Grosberg RK. Aggression, Habituation, and Clonal Coexistence in the Sea-  
481 Anemone *Anthopleura-Elegantissima*. *Am Nat.* 1995;146(3):427-53.
- 482 4. Mitani JC, Watts DP, Amsler SJ. Lethal intergroup aggression leads to territorial  
483 expansion in wild chimpanzees. *Current Biology.* 2010;20(12):R507-R8.

- 484 5. Scheel D, Godfrey-Smith P, Lawrence M. Signal Use by Octopuses in Agonistic  
485 Interactions. *Current Biology*. 2016;26(3):377-82.
- 486 6. Morel L, Vandermeer RK, Lavine BK. Ontogeny of Nestmate Recognition Cues in the  
487 Red Carpenter Ant (*Camponotus-Floridanus*) - Behavioral and Chemical Evidence for the Role  
488 of Age and Social Experience. *Behav Ecol Sociobiol*. 1988;22(3):175-83.
- 489 7. Endler A, Liebig J, Schmitt T, Parker JE, Jones GR, Schreier P, et al. Surface  
490 hydrocarbons of queen eggs regulate worker reproduction in a social insect. *Proc Natl Acad Sci*  
491 *USA*. 2004;101(9):2945-50.
- 492 8. Moore D, Liebig J. Mechanisms of social regulation change across colony development  
493 in an ant. *BMC Evol Biol*. 2010;10:328.
- 494 9. Yan H, Opachaloemphan C, Mancini G, Yang H, Gallitto M, Mlejnek J, et al. An  
495 Engineered *orco* Mutation Produces Aberrant Social Behavior and Defective Neural  
496 Development in Ants. *Cell*. 2017;170(4):736-47 e9.
- 497 10. Tribble W, Olivios-Cisneros L, McKenzie SK, Saragosti J, Chang NC, Matthews BJ, et al.  
498 *orco* Mutagenesis Causes Loss of Antennal Lobe Glomeruli and Impaired Social Behavior in  
499 Ants. *Cell*. 2017;170(4):727-35 e10.
- 500 11. Gadau J, Heinze J, Holldobler B, Schmid M. Population and colony structure of the  
501 carpenter ant *Camponotus floridanus*. *Mol Ecol*. 1996;5(6):785-92.
- 502 12. Gordon DM. From division of labor to the collective behavior of social insects. *Behav*  
503 *Ecol Sociobiol*. 2015;70(7):1101-8.
- 504 13. Neupert S, Hornung M, Millar JG, Kleineidam CJ. Learning Distinct Chemical Labels of  
505 Nestmates in Ants. *Frontiers in Behavioral Neuroscience*. 2018;12.
- 506 14. Vander Meer R, Morel L. Nestmate recognition in ants. In: Vander Meer R, Breed MD,  
507 Winston ML, Espelie KE, editors. *Pheromone Communication in Social Insects*. Boulder, CO:  
508 Westview Press; 1998. p. 79-103.
- 509 15. Obin MS, Vandermeer RK. Mechanism of Template-Label Matching in Fire Ant,  
510 *Solenopsis-Invicta Buren*, Nestmate Recognition. *Animal Behaviour*. 1989;38:430-5.
- 511 16. Guerrieri FJ, Nehring V, Jorgensen CG, Nielsen J, Galizia CG, d'Ettorre P. Ants  
512 recognize foes and not friends. *P Roy Soc B-Biol Sci*. 2009;276(1666):2461-8.
- 513 17. Crozier RH, Dix MW. Analysis of two genetic models for the innate components of  
514 colony odor in social Hymenoptera. *Behavioural Ecology and Sociobiology*. 1979;4(3):217-24.
- 515 18. Sherman PW, Reeve HK, Pfennig DW. Recognition Systems. In: Krebs JR, Davies NB,  
516 editors. *Behavioural ecology: an evolutionary approach*. Oxford, UK: Wiley-Blackwell; 1997. p.  
517 69–96.
- 518 19. Ozaki M, Wada-Katsumata A, Fujikawa K, Iwasaki M, Yokohari F, Satoji Y, et al. Ant  
519 nestmate and nonnestmate discrimination by a chemosensory sensillum. *Science*. 2005;309:311–  
520 4.
- 521 20. Brandstaetter A, Rössler W, Kleineidam C. Friends and Foes from an Ant Brain's Point  
522 of View – Neuronal Correlates of Colony Odors in a Social Insect. *PLoS ONE*. 2011;6(6):  
523 e21383-92.
- 524 21. Brandstaetter AS, Kleineidam CJ. Distributed representation of social odors indicates  
525 parallel processing in the antennal lobe of ants. *J Neurophysiol*. 2011;106(5): 2437-49.
- 526 22. Suh E, Bohbot J, Zwiebel LJ. Peripheral olfactory signaling in insects. *Curr Opin Insect*  
527 *Sci*. 2014;6:86-92.

- 528 23. Zhou X, Slone JD, Rokas A, Berger SL, Liebig J, Ray A, et al. Phylogenetic and  
529 transcriptomic analysis of chemosensory receptors in a pair of divergent ant species reveals sex-  
530 specific signatures of odor coding. *PLoS Genet.* 2012;8(8):e1002930.
- 531 24. Larsson MC, Domingos AI, Jones WD, Chiappe ME, Amrein H, Vosshall LB. Or83b  
532 encodes a broadly expressed odorant receptor essential for *Drosophila* olfaction. *Neuron.*  
533 2004;43(5):703-14.
- 534 25. Benton R, Sachse S, Michnick SW, Vosshall LB. Atypical membrane topology and  
535 heteromeric function of *Drosophila* odorant receptors in vivo. *PLoS Biol.* 2006;4(2):e20.
- 536 26. Sato K, Pellegrino M, Nakagawa T, Vosshall LB, Touhara K. Insect olfactory receptors  
537 are heteromeric ligand-gated ion channels. *Nature.* 2008;452(7190):1002-6.
- 538 27. Wicher D, Schafer R, Bauernfeind R, Stensmyr MC, Heller R, Heinemann SH, et al.  
539 *Drosophila* odorant receptors are both ligand-gated and cyclic-nucleotide-activated cation  
540 channels. *Nature.* 2008;452(7190):1007-11.
- 541 28. Jones PL, Pask GM, Rinker DC, Zwiebel LJ. Functional agonism of insect odorant  
542 receptor ion channels. *Proc Natl Acad Sci U S A.* 2011;108(21):8821-5.
- 543 29. Pask GM, Jones PL, Rutzler M, Rinker DC, Zwiebel LJ. Heteromeric Anopheline  
544 odorant receptors exhibit distinct channel properties. *PLoS One.* 2011;6(12):e28774.
- 545 30. Zhou X, Rokas A, Berger SL, Liebig J, Ray A, Zwiebel LJ. Chemoreceptor Evolution in  
546 Hymenoptera and Its Implications for the Evolution of Eusociality. *Genome Biol Evol.*  
547 2015;7(8):2407-16.
- 548 31. Smith CR, Smith CD, Robertson HM, Helmkampf M, Zimin A, Yandell M, et al. Draft  
549 genome of the red harvester ant *Pogonomymex barbatus*. *Proceedings of the National Academy*  
550 *of Sciences.* 2011:1-6.
- 551 32. Robertson HM, Wanner KW. The chemoreceptor superfamily in the honey bee, *Apis*  
552 *mellifera*: expansion of the odorant, but not gustatory, receptor family. *Genome Res.*  
553 2006;16(11):1395-403.
- 554 33. Bonasio R, Zhang G, Ye C, Mutti NS, Fang X, Qin N, et al. Genomic comparison of the  
555 ants *Camponotus floridanus* and *Harpegnathos saltator*. *Science.* 2010;329(5995):1068-71.
- 556 34. Wurm Y, Wang J, Riba-Grognuz O, Corona M, Nygaard S, Hunt BG, et al. The genome  
557 of the fire ant *Solenopsis invicta*. *Proc Natl Acad Sci U S A.* 2011;108(14):5679-84.
- 558 35. Oxley PR, Ji L, Fetter-Pruneda I, McKenzie SK, Li C, Hu H, et al. The genome of the  
559 clonal raider ant *Cerapachys biroi*. *Curr Biol.* 2014;24(4):451-8.
- 560 36. Werren JH, Richards S, Desjardins CA, Niehuis O, Gadau J, Colbourne JK, et al.  
561 Functional and evolutionary insights from the genomes of three parasitoid *Nasonia* species.  
562 *Science.* 2010;327(5963):343-8.
- 563 37. Smith CD, Zimin A, Holt C, Abouheif E, Benton R, Cash E, et al. Draft genome of the  
564 globally widespread and invasive Argentine ant (*Linepithema humile*). *Proc Natl Acad Sci U S*  
565 *A.* 2011;108(14):5673-8.
- 566 38. Slone JD, Pask GM, Ferguson ST, Millar JG, Berger SL, Reinberg D, et al. Functional  
567 characterization of odorant receptors in the ponerine ant, *Harpegnathos saltator*. *Proc Natl Acad*  
568 *Sci U S A.* 2017;114(32):8586-91.
- 569 39. Pask GM, Slone JD, Millar JG, Das P, Moreira JA, Zhou XF, et al. Specialized odorant  
570 receptors in social insects that detect cuticular hydrocarbon cues and candidate pheromones. *Nat*  
571 *Commun.* 2017;8.

- 572 40. Sharma KR, Enzmann BL, Schmidt Y, Moore D, Jones GR, Parker J, et al. Cuticular  
573 Hydrocarbon Pheromones for Social Behavior and Their Coding in the Ant Antenna. *Cell Rep.*  
574 2015;12(8):1261-71.
- 575 41. Bos N, d'Ettorre P. Recognition of social identity in ants. *Front Psychol.* 2012;3(83).
- 576 42. Leonhardt SD, Brandstaetter AS, Kleineidam CJ. Reformation process of the neuronal  
577 template for nestmate-recognition cues in the carpenter ant *Camponotus floridanus*. *J Comp*  
578 *Physiol A Neuroethol Sens Neural Behav Physiol.* 2007;193(9):993-1000.
- 579 43. Forel A. The social world of the ants compared with that of man. London and New York:  
580 G.P. Putnam's Sons, Ltd.; 1928.
- 581 44. Wang Q, Goodger JQ, Woodrow IE, Elgar MA. Location-specific cuticular hydrocarbon  
582 signals in a social insect. *Proc Biol Sci.* 2016;283(1827):20160310.
- 583 45. Nakanishi A, Nishino H, Watanabe H, Yokohari F, Nishikawa M. Sex-specific antennal  
584 sensory system in the ant *Camponotus japonicus*: structure and distribution of sensilla on the  
585 flagellum. *Cell Tissue Res.* 2009;338(1):79-97.
- 586 46. Rinker DC, Jones PL, Pitts RJ, Rutzler M, Camp G, Sun LJ, et al. Novel high-throughput  
587 screens of *Anopheles gambiae* odorant receptors reveal candidate behaviour-modifying  
588 chemicals for mosquitoes. *Physiological Entomology.* 2012;37(1):33-41.
- 589 47. Jones PL, Pask GM, Romaine IM, Taylor RW, Reid PR, Waterson AG, et al. Allosteric  
590 antagonism of insect odorant receptor ion channels. *PLoS One.* 2012;7(1):e30304.
- 591 48. Taylor RW, Romaine IM, Liu C, Murthi P, Jones PL, Waterson AG, et al. Structure-  
592 activity relationship of a broad-spectrum insect odorant receptor agonist. *ACS Chem Biol.*  
593 2012;7(10):1647-52.
- 594 49. Romaine IM, Taylor RW, Saidu SP, Kim K, Sulikowski GA, Zwiebel LJ, et al. Narrow  
595 SAR in odorant sensing Orco receptor agonists. *Bioorg Med Chem Lett.* 2014;24(12):2613-6.
- 596 50. Tsitoura P, Iatrou K. Positive Allosteric Modulation of Insect Olfactory Receptor  
597 Function by ORco Agonists. *Front Cell Neurosci.* 2016;10:275.
- 598 51. Tsitoura P, Koussis K, Iatrou K. Inhibition of *Anopheles gambiae* odorant receptor  
599 function by mosquito repellents. *J Biol Chem.* 2015;290(12):7961-72.
- 600 52. Hansen IA, Rodriguez SD, Drake LL, Price DP, Blakely BN, Hammond JI, et al. The  
601 Odorant Receptor Co-Receptor from the Bed Bug, *Cimex lectularius* L. *PLoS ONE.*  
602 2014;9(11):e113692.
- 603 53. Butterwick JA, del Marmol J, Kim KH, Kahlson MA, Rogow JA, Walz T, et al. Cryo-  
604 EM structure of the insect olfactory receptor Orco. *Nature.* 2018;560(7719):447-52.
- 605 54. Guerrieri FJ, d'Ettorre P. The mandible opening response: quantifying aggression elicited  
606 by chemical cues in ants. *J Exp Biol.* 2008;211(Pt 7):1109-13.
- 607 55. Gospocic J, Shields EJ, Glastad KM, Lin YP, Penick CA, Yan H, et al. The Neuropeptide  
608 Corazonin Controls Social Behavior and Caste Identity in Ants. *Cell.* 2017;170(4):748-59.
- 609 56. Sturgis SJ, Gordon DM. Nestmate recognition in ants (Hymenoptera: Formicidae): a  
610 review. *Myrmecol News.* 2012;16:101-10.
- 611 57. Jones WD, Nguyen TA, Kloss B, Lee KJ, Vosshall LB. Functional conservation of an  
612 insect odorant receptor gene across 250 million years of evolution. *Curr Biol.* 2005;15(4):R119-  
613 21.
- 614 58. van Zweden JS, d'Ettorre P. Nestmate recognition in social insects and the role of  
615 hydrocarbons. In: Blonquist GJ, Bagnères AG, editors. *Insect Hydrocarbons: Biology,*  
616 *Biochemistry, and Chemical Ecology: Cambridge University Press; 2010.*



- 617 59. Reeve HK. The Evolution of Conspecific Acceptance Thresholds. *Am Nat.*  
618 1989;133(3):407-35.
- 619 60. Vander Meer RK, Saliwanchik D, Lavine B. Temporal changes in colony cuticular  
620 hydrocarbon patterns of *Solenopsis invicta*: Implications for nestmate recognition. *J Chem Ecol.*  
621 1989;15(7):2115-25.
- 622 61. Wagner D, Brown MJF, Broun P, Cuevas W, Moses LE, Chao DL, et al. Task-related  
623 differences in the cuticular hydrocarbon composition of harvester ants, *Pogonomyrmex barbatus*.  
624 *Journal of Chemical Ecology.* 1998;24(12):2021-37.
- 625 62. Kaib M, Eisermann B, Schoeters E, Billen J, Franke S, Francke W. Task-related variation  
626 of postpharyngeal and cuticular hydrocarbon compositions in the ant *Myrmicaria eumenoides*. *J*  
627 *Comp Physiol A.* 2000;186(10):939-48.
- 628 63. Nascimento FS, Tannure-Nascimento IC, Dantas JO, Turatti IC, Lopes NP. Task-Related  
629 Variation of Cuticular Hydrocarbon Profiles Affect Nestmate Recognition in the Giant ant  
630 *Dinoponera quadriceps*. *J Insect Behav.* 2013;26(2):212-22.
- 631

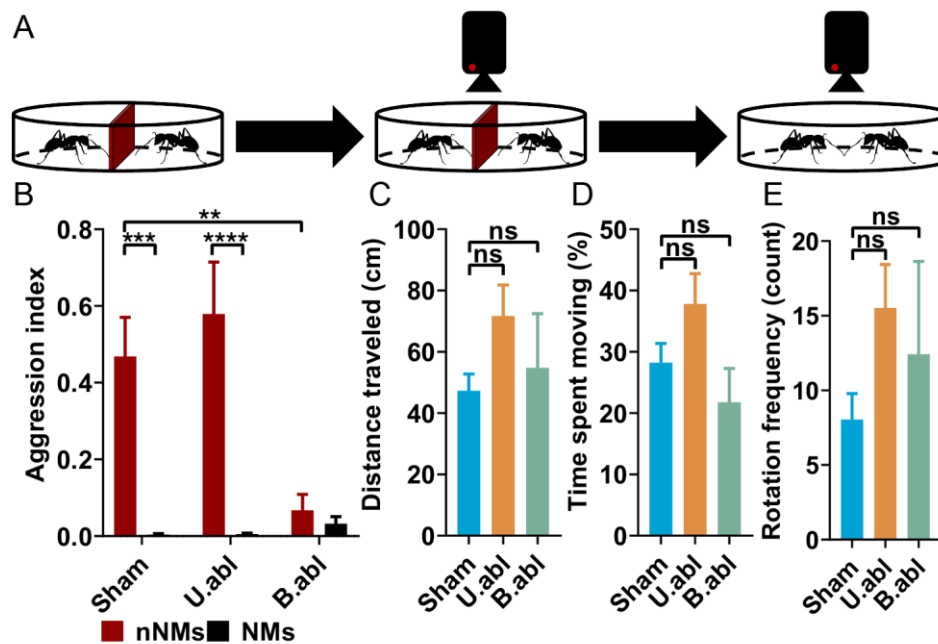

632

633 **Fig. 1.** Aggression and mobility responses of adult minor workers following antennal ablation  
634 (Sham = control; U.abl = unilateral ablation; B.abl = bilateral ablation). (A) Schematic of the  
635 ablation bioassay depicting the acclimation period (left), mobility controls (center), and  
636 aggression bioassay (right). (B) Bilateral antennal ablations significantly reduce nNM aggression  
637 compared to the sham control (Two-Way ANOVA, N=6-10). (C-E) There is no significant  
638 difference across the mobility parameters tested between the sham control and either of the

639 ablation treatments (Kruskal-Wallis Test, N=24-29). Error bars display S.E.M. Asterisks indicate  
640 P-value: \*\*<0.01, \*\*\*<0.001, \*\*\*\*<0.0001.

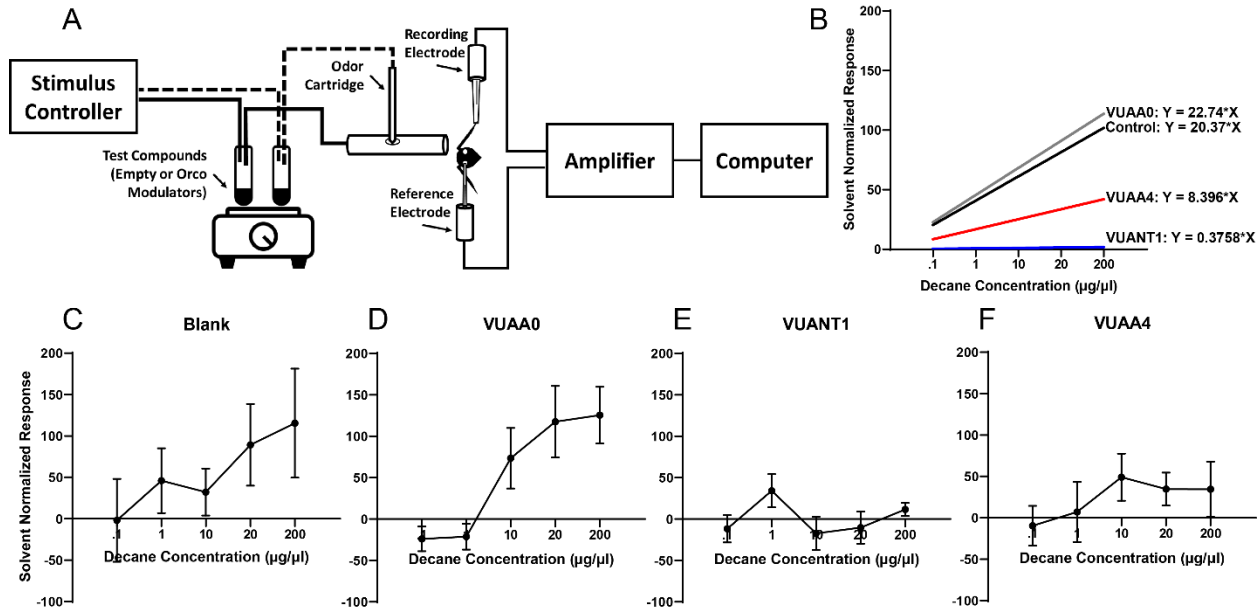

641  
642 **Fig. 2.** Electrophysiological responses of adult minor workers to the hydrocarbon decane under  
643 different background airflow conditions (Blank = heated air alone; VUAA0 = inert chemical  
644 analog control; VUANT1 = Orco antagonist; VUAA4 = Orco agonist). (A) Schematic of the  
645 electroantennograms. (B) Best-fit lines derived from the solvent (hexane) normalized responses  
646 to serial concentrations of decane for Blank (C), VUAA0 (D), VUANT1 (E), and VUAA4 (F)  
647 backgrounds. The slope of the best-fit line for Blank, VUAA0, and VUAA4 are significantly  
648 different from 0 (Linear Regression, N=5-6, see Additional File 3). Error bars display S.E.M.

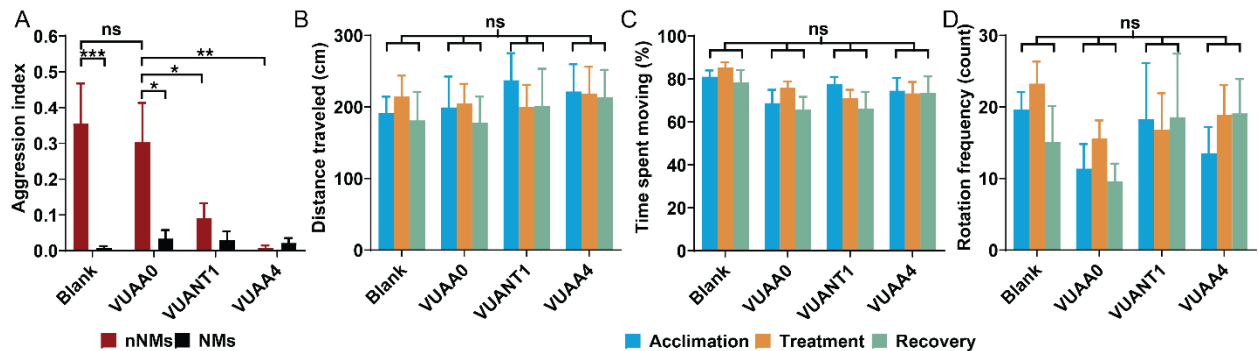

649

650 **Fig. 3.** Aggression and mobility responses of adult minor workers during exposure to  
651 volatilization treatments (Blank = heated air alone; VUAA0 = inert chemical analog control;  
652 VUANT1 = Orco antagonist; VUAA4 = Orco agonist). (A) Disrupting Orco-mediated olfactory  
653 signal transduction significantly reduces aggression towards nNMs (Two-Way ANOVA, N=10-  
654 12). (B-D) There is no significant interaction between treatments across the mobility parameters  
655 tested (RM Two-Way ANOVA, N=7-9). Error bars display S.E.M. Asterisks indicate P-value:  
656 \* $<0.05$ , \*\* $<0.01$ , \*\*\* $<0.001$ .

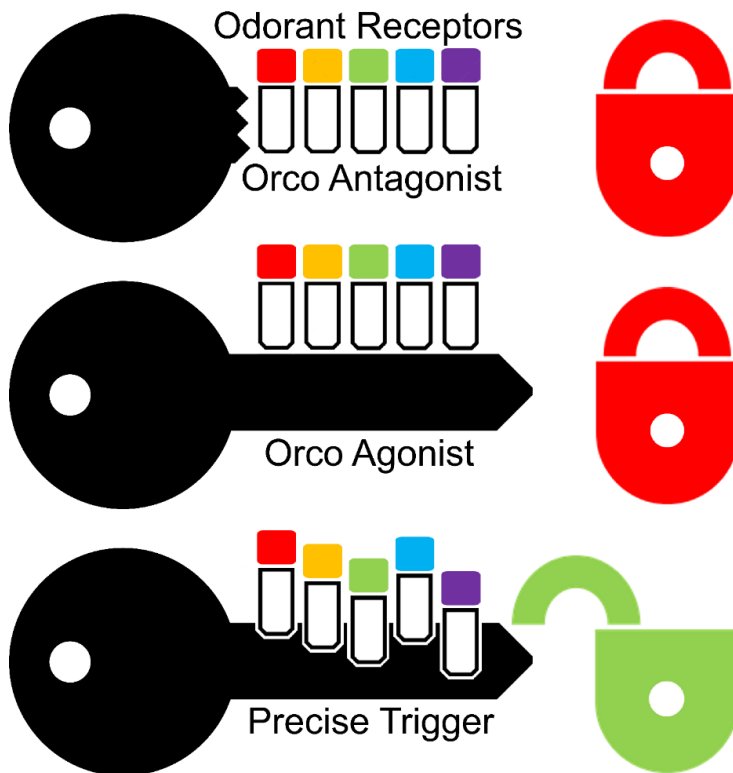

657  
658 **Fig. 4.** Lock-and-key model of nNM recognition and aggression. The triggering stimuli,  
659 represented by the teeth on a key, must be precisely detected by the OR-tumblers in the lock.  
660 OR-dependent recognition of nNM cues leads to aggression against foes (green open lock);  
661 however, blocking OR-dependent recognition of NM/nNM cues does not lead to aggression nor  
662 does the presence of an ambiguous chemical cue (closed red locks).

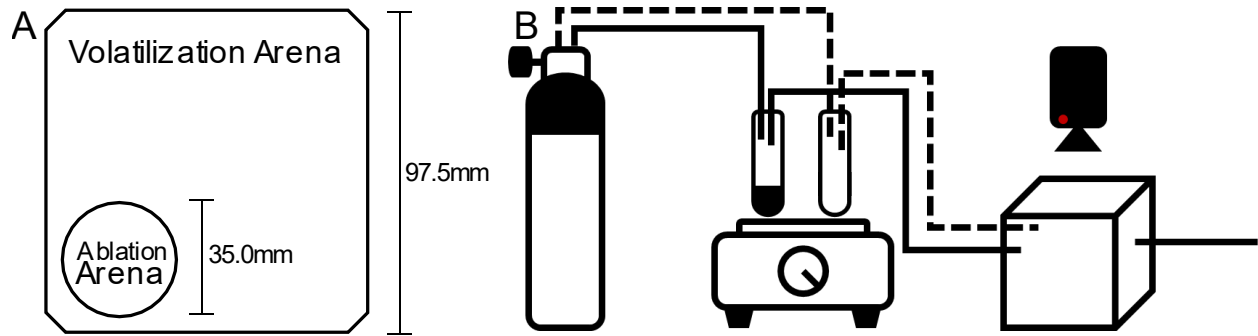

664 **Additional file 1 (.pptx)**

665 Comparison of the aggression bioassay arenas (A) and a schematic of the volatilization bioassay  
666 schematic (B).

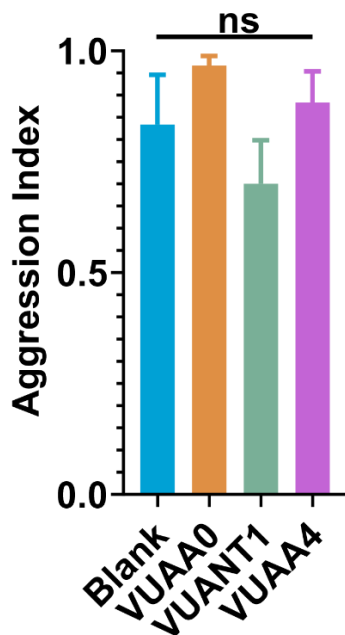

668 **Additional file 2 (.pptx)**

669 Aggression (biting and wide opening of the mandibles) of individual ants in response to a  
670 mechanical stimulus from a Von Frey filament. There is no significant difference in aggression  
671 between ants exposed to either heated-air alone (Blank), VUAA0, VUANT1, or VUAA4  
672 (Kruskal-Wallis test, N=10-11). Error bars display S.E.M.

673 **Additional File 3 (.xls)**

674 Summary of statistical test results.

675 **Additional File 4 (.xls)**

676 Raw data for ablation aggression bioassay.

677 **Additional File 5 (.xls)**

678 Raw data for mobility controls (ablation).

679 **Additional File 6 (.xls)**

680 Raw data for electroantennograms.

681 **Additional File 7 (.xls)**

682 Raw data for volatile Orco modulator aggression bioassay.

683 **Additional File 8 (.xls)**

684 Raw data for mechanically evoked biting and mandible opening response bioassay.

685 **Additional File 9 (.xls)**

686 Raw data for mobility controls (volatilization).

687 **Additional File 10 (.mp4)**

688 Examples of aggression and non-aggression observed in the ablation aggression bioassay.

689 **Additional File 11 (.mp4)**

690 Examples of aggression and non-aggression observed in the volatile Orco modulator aggression  
691 bioassay.

692 **Additional File 12 (.mp4)**

693 Examples of aggression and non-aggression observed in the mechanically evoked biting and  
694 mandible opening response bioassay.
